## Staminal Evolution in the Genus *Salvia* (Lamiaceae): Molecular Phylogenetic Evidence for Multiple Origins of the Staminal Lever

JAY B. WALKER\* and KENNETH J. SYTSMA

Department of Botany, University of Wisconsin, Madison, 132 Birge Hall, 430 Lincoln Drive, Madison, WI 53706, USA

Received: 20 October 2005 Revision requested: 15 February 2006 Accepted: 28 June 2006 Published electronically: 22 August 2006

• **Background and Aims** The genus *Salvia* has traditionally included any member of the tribe Mentheae (Lamiaceae) with only two stamens and with each stamen expressing an elongate connective. The recent demonstration of the non-monophyly of the genus presents interesting implications for staminal evolution in the tribe Mentheae. In the context of a molecular phylogeny, the staminal morphology of the various lineages of *Salvia* and related genera is characterized and an evolutionary interpretation of staminal variation within the tribe Mentheae is presented.

• **Methods** Two molecular analyses are presented in order to investigate phylogenetic relationships in the tribe Mentheae and the genus *Salvia*. The first presents a tribal survey of the Mentheae and the second concentrates on *Salvia* and related genera. Schematic sketches are presented for the staminal morphology of each major lineage of *Salvia* and related genera.

• **Key Results** These analyses suggest an independent origin of the staminal elongate connective on at least three different occasions within the tribe Mentheae, each time with a distinct morphology. Each independent origin of the lever mechanism shows a similar progression of staminal change from slight elongation of the connective tissue separating two fertile thecae to abortion of the posterior thecae and fusion of adjacent posterior thecae. A monophyletic lineage within the Mentheae is characterized consisting of the genera *Lepechinia*, *Melissa*, *Salvia*, *Dorystaechas*, *Meriandra*, *Zhumeria*, *Perovskia* and *Rosmarinus*.

• **Conclusions** Based on these results the following are characterized: (1) the independent origin of the staminal lever mechanism on at least three different occasions in *Salvia*, (2) that *Salvia* is clearly polyphyletic, with five other genera intercalated within it, and (3) staminal evolution has proceeded in different ways in each of the three lineages of *Salvia* but has resulted in remarkably similar staminal morphologies.

**Key words:** Staminal morphology, *Salvia*, Mentheae, *Dorystaechas*, *Meriandra*, *Perovskia*, *Rosmarinus*, *Zhumeria*, *Lepechinia*, *Melissa*, key innovation, floral evolution.

### INTRODUCTION

The genus *Salvia* (Lamiaceae: tribe Mentheae) represents a cosmopolitan assemblage of nearly 1000 species displaying a remarkable diversity in growth forms, secondary compounds, floral morphology and pollination biology. *Salvia* has radiated extensively in three regions of the world: Central and South America (500 spp.), western Asia (200 spp.) and eastern Asia (100 spp.) (Alziar, 1988–1993). All these species display the unusual morphological character that has led to the long-standing assumption that *Salvia* is monophyletic: the significant elongation of the connective tissue of the two expressed anthers (Figs 1 and 2). The demonstration of the non-monophyly of the genus (Walker *et al.*, 2004) has led to a reinvestigation of the defining character of the genus, the elongation of the connective tissue of the stamen, within *Salvia* and closely related genera in the Mentheae. This paper presents a molecular phylogeny of *Salvia* and related genera, characterizes the stamen morphology in the different clades of the genus *Salvia* and closely related genera, and interprets that stamen morphology in a phylogenetic context.

Mentheae (*sensu* Wagstaff *et al.*, 1995) is a well-supported monophyletic tribe containing 73 genera

within the subfamily Nepetoideae (Cantino *et al.*, 1992; Wagstaff, 1992; Wagstaff *et al.*, 1995; Walker *et al.*, 2004; Bräuchler *et al.*, 2005). *Salvia* is distinguished from the other 72 genera in the tribe Mentheae by having the two posterior stamens aborted, and the connective separating the thecae of the two expressed stamens significantly elongated (Fig. 2). It is the elongation of the staminal connective that allows the formation of the lever mechanism of pollination for which *Salvia* is best known (Fig. 1) (for thorough reviews, see Claßen-Bockhoff *et al.*, 2003, 2004a). The significant species radiations that are correlated with the presence of the lever mechanism in *Salvia* (e.g. subgen. *Calosphace* – 500 spp.) suggest it may be the lever mechanism in a selective regime of pollination that is driving evolution in the group (Claßen-Bockhoff *et al.*, 2004b). The significance of this lever mechanism to the reproductive biology in *Salvia*, first described by Sprengel (1793), has received considerable attention (Müller, 1873; Zalewska, 1928; Hruby, 1934; Werth, 1956; Baikova, 2002, 2004; Claßen-Bockhoff *et al.*, 2003, 2004a; Reith *et al.*, 2006; Wester and Claßen-Bockhoff, 2006). Himmelbaur and Stibal (1932–1934) directly addressed staminal evolution in *Salvia*, presenting a hypothesis of parallel evolution of the lever mechanism (from a common ancestor) in the New World and the Old World. This

\* For correspondence. E-mail j.a.y.walker@sbcglobal.net

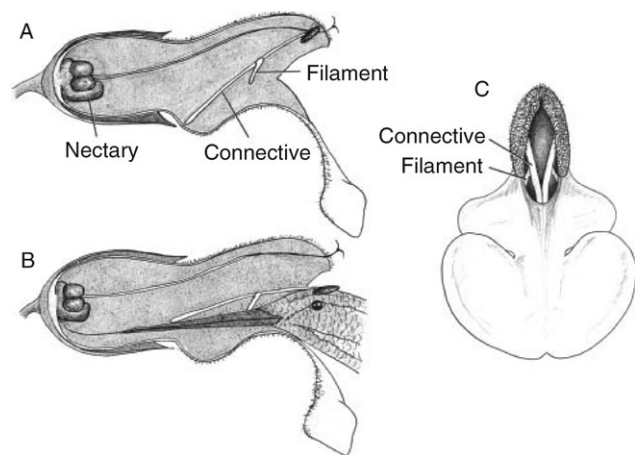

FIG. 1. Stylized representation of the flower and lever mechanism of pollination of a hypothetical member of *Salvia* subgen. *Calosphace* (*Salvia* clade II). A flower prior to the activation of the lever mechanism (A). The pollinator enters the flower and activates the lever mechanism (B), depositing pollen on the head of the pollinator. (C) A 'birds-eye' view of the flower, with the fused posterior branches of the connective blocking access to the nectar at the base of the corolla (sketch by Cody Williams).

papers presents the first, robust, *Salvia*-wide molecular phylogeny with sampling across the tribe Mentheae directly to evaluate Himmelbaur and Stibal's (1932–1934) hypothesis of independent origins of the lever mechanism in *Salvia*. Additionally, the following questions are addressed and answered. How many times has an elongate connective originated in *Salvia* and related genera? How many times has the staminal lever mechanism originated in Mentheae? What are the most closely related genera to *Salvia*? What are the trends in staminal evolution within *Salvia*?

## MATERIALS AND METHODS

### Taxa sampling

Sampling within the genus *Salvia* attempted to include as wide a morphological and biogeographical diversity as possible. Within the New World, there is a high level of confidence that the sampling represents every major clade

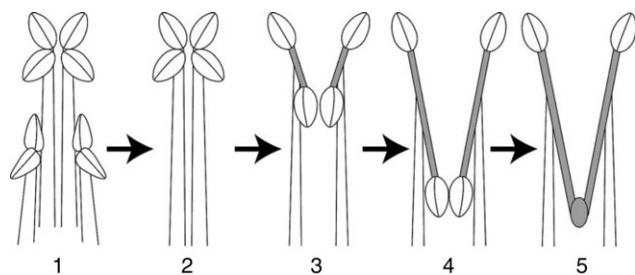

FIG. 2. The generalized trend in stamen morphology seen within tribe Mentheae leading to that seen in *Salvia*. Shaded areas represent connective tissue. Step 2 (the functional loss of two of the four stamens) has apparently happened only once in the *Salvia* clade. The progression from step 2 to step 5 has happened on at least three independent occasions in the *Salvia* clade. Anterior thecae are on the top of each sketch, and the posterior thecae, which become entirely aborted and fused in step 5, are on the bottom of each sketch.

of *Salvia*. In addition to the monophyly of the 500 species in the subgenus *Calosphace* being supported by morphology (Bentham, 1876; Epling, 1939; Claßen-Bockhoff *et al.*, 2004a), the monophyly is supported by molecular data collected as part of this project and by a continuing project sampling 200 species in the subgenus (our unpubl. data). Sampling included 20 of the remaining 28 non-subgenus *Calosphace* species of *Salvia* in the New World. The Old World represents a larger challenge for sampling within *Salvia*, as the subgeneric groups are less well established. Sampling was attempted from each of the informal subgeneric groups suggested by Hedge (1974a, b, 1982a, b) based on morphology. The 26 Old World *Salvia* sampled certainly do not represent every major clade of *Salvia* present. However, the sampling includes southern African, northern African, Mediterranean, European, west Asian, central Asian and east Asian species of *Salvia*.

Nomenclature for *Salvia* follows that suggested by Alziar (1988–1993). One hundred and forty-four *trnL-F* sequences, 139 nuclear rDNA internal transcribed spacer (ITS) sequences and 85 *psbA-trnH* sequences representing 38 genera and 144 species were obtained in this project (Table 1). Accessions, vouchers, locality and GenBank numbers are also given in Table 1. The data matrix for the 'Mentheae-wide analysis' combined ITS, *psbA-trnH* and *trnL-F* and consisted of 84 taxa. The data matrix for the '*Salvia* clade analysis' combined ITS and *trnL-F* and comprised 93 taxa. Studies have demonstrated the monophyly of the tribe Mentheae, as well as its close relation to the tribe Ocimeae (Paton *et al.*, 2004; Walker *et al.*, 2004; Bräuchler *et al.*, 2005). Outgroups chosen for the Mentheae-wide analysis were *Ocimum basilicum* and *Hyptis alata*, both from the tribe Ocimeae. Within the Mentheae, 34 genera were sampled that represented all subtribes of Mentheae. Within the '*Salvia* clade analysis', sampling concentrated on the genus *Salvia* (82 species sampled) and all genera indicated by the 'Mentheae-wide analysis' to be closely related to *Salvia*. *Horminum pyrenaicum* was selected as the outgroup for the '*Salvia* clade analysis' based on the results of the 'Mentheae-wide analysis'.

### Extractions, amplification and sequencing

Total genomic DNA was extracted using DNeasy Plant Mini kits (Qiagen, Valencia, CA, USA). Leaves used for DNA extractions were fresh, frozen, silica dried or obtained from herbarium specimens (see Table 1). Polymerase chain amplification (PCR) and cycle sequencing followed the methods described elsewhere (Conti *et al.*, 1996; Givnish *et al.*, 2000). PCR product was purified either with the QIAquick PCR purification kit (Qiagen) or with the AmPure PCR purification kit (Agencourt, Beverly, MA, USA). Sequenced products were precipitated in ethanol and sodium acetate to remove excess dye terminators or cleaned with the CleanSEQ Sequencing Reaction Clean-up system (Agencourt). Contiguous alignments were edited using Sequencher v. 3.0 (Gene Codes, Ann Arbor, MI, USA).

TABLE 1. *Plant materials included in this study*

| Men. | Sal. | Taxon                                                                   | Locality             | Voucher                             | <i>psbA-trnH</i> sequence | ITS sequence | <i>trnL-trnF</i> sequence |
|------|------|-------------------------------------------------------------------------|----------------------|-------------------------------------|---------------------------|--------------|---------------------------|
| Yes  |      | <i>Acanthomintha lanceolata</i> Curran                                  | herb-MO 3133280      | Crosby&Morin 14383                  | DQ667418                  | DQ667333     | DQ667522                  |
| Yes  |      | <i>Agastache urticifolia</i> Kunth                                      | wild-USA (WIS)       | JBW 815                             | DQ667357                  | DQ667247     | AY570452                  |
| Yes  |      | <i>Cleonia lusitanica</i> L.                                            | herb-F               | D. Sanchez & R. Garilan<br>20-VI-8? | DQ667395                  | DQ667309     | DQ667495                  |
| Yes  |      | <i>Clinopodium ashei</i> Small                                          | wild-USA (WIS)       | JBW 742                             | DQ667348                  | DQ667237     | DQ667437                  |
| Yes  |      | <i>Clinopodium coccineum</i> Kuntze                                     | wild-USA (WIS)       | JBW 741                             | DQ667344                  | DQ667233     | DQ667433                  |
| Yes  |      | <i>Clinopodium vulgare</i> L.                                           | wild-USA (WIS)       | JBW 3227                            | DQ667409                  | DQ667324     | DQ667513                  |
| Yes  |      | <i>Collinsonia canadensis</i> L.                                        | wild-USA (WIS)       | JBW 958                             | DQ667358                  | DQ667248     | AY570453                  |
| Yes  |      | <i>Conradina canescens</i> A. Gray                                      | wild-USA (WIS)       | JBW 604                             | DQ667349                  | DQ667238     | DQ667438                  |
| Yes  |      | <i>Cunila galioides</i> Benth.                                          | wild-Argentina (WIS) | Sytsma 7247                         | DQ667391                  | DQ667305     | DQ667491                  |
| Yes  |      | <i>Cunila incana</i> Benth.                                             | wild-Argentina (WIS) | Sytsma 7224                         | DQ667403                  | DQ667316     | DQ667504                  |
| Yes  |      | <i>Dicerandra oderatissima</i> R.M. Harper                              | wild-USA (WIS)       | JBW 1063                            | DQ667345                  | DQ667234     | DQ667434                  |
| Yes  | Yes  | <i>Dorystaechas hastata</i> Boiss. & Heldr.<br>Ex Benth.                | cult-RBG-Edinburgh   | 1972-0177D                          | DQ667360                  | DQ667252     | AY570454                  |
| Yes  |      | <i>Drepanocaryum sewerzowskii</i> (Regel)<br>Pojark.                    | herb-MO 5201825      | Rinziraeva 7540                     | DQ667413                  | DQ667328     | DQ667517                  |
| Yes  |      | <i>Glechoma hederacea</i> L.                                            | cult-USA (WIS)       | JBW 2579                            | DQ667355                  | DQ667245     | AY570455                  |
| Yes  |      | <i>Glechom marifolia</i> Benth.                                         | wild-Argentina (WIS) | Sytsma 7214                         | DQ667390                  | DQ667303     | DQ667489                  |
| Yes  |      | <i>Glechom thymoides</i> Spreng.                                        | herb-F               | CA Mondin 1421                      | DQ667396                  | DQ667310     | DQ667496                  |
| Yes  |      | <i>Hedeoma costatum</i> (Greene) Irving                                 | wild-USA (WIS)       | JBW 2143                            | DQ667347                  | DQ667236     | DQ667436                  |
| Yes  |      | <i>Hoehnea epilobioides</i> (Epl.) Epl.                                 | herb-F               | G. Hatschbach 8/3/1984              | DQ667397                  |              | DQ667497                  |
| Yes  | Yes  | <i>Horminum pyrenaicum</i> L.                                           | cult-RBG-Edinburgh   | 1997-2109a                          | DQ667365                  | DQ667257     | AY570456                  |
| Yes  |      | <i>Hyptis alata</i> (Raf.) Shinners                                     | wild-USA (WIS)       | JBW 1019                            | DQ667346                  | DQ667235     | DQ667435                  |
| Yes  |      | <i>Lepechinia calycina</i> Epl.                                         | wild-USA (WIS)       | JBW 3186                            | DQ667394                  | DQ667308     | DQ667494                  |
| Yes  | Yes  | <i>Lepechinia chamaedryoides</i> Epl.                                   | cult-USA (WIS)       | JBW 2537                            | DQ667343                  | DQ667231     | AY570459                  |
| Yes  | Yes  | <i>Lepechinia conferta</i> Epl.                                         | herb-F               | Alonso 8376                         | DQ667393                  | DQ667307     | DQ667493                  |
| Yes  | Yes  | <i>Lepechinia lancifolia</i> Epl.                                       | herb-F               | Smith 444                           | DQ667392                  | DQ667306     | DQ667492                  |
| Yes  |      | <i>Lycopus uniflorus</i> Michx.                                         | wild-USA (WIS)       | JBW 2586                            | DQ667389                  | DQ667302     | DQ667488                  |
| Yes  | Yes  | <i>Melissa officinalis</i> L.                                           | cult-USA (WIS)       | JBW 2575                            | DQ667387                  | DQ667291     | DQ667477                  |
| Yes  |      | <i>Mentha arvensis</i> L.                                               | wild-USA (WIS)       | JBW 3228                            | DQ667410                  | DQ667325     | DQ667514                  |
| Yes  |      | <i>Mentha spicata</i> L.                                                | cult-USA (WIS)       | JBW 2566                            | DQ667354                  | DQ667244     | AY570461                  |
| Yes  | Yes  | <i>Meriandra bengalensis</i> (Roxb.) Benth                              | herb-MO 2633828      | Lavranus & Newton<br>15796          | DQ667414                  | DQ667329     | DQ667518                  |
| Yes  |      | <i>Monarda fistulosa</i> L.                                             | wild-USA (WIS)       | JBW 3223                            | DQ667405                  | DQ667318     | DQ667506                  |
| Yes  |      | <i>Nepeta cataria</i> L.                                                | wild-USA (WIS)       | JBW 3054                            | DQ667388                  | DQ667301     | DQ667487                  |
| Yes  |      | <i>Ocimum basilium</i> L.                                               | cult-USA (WIS)       | JBW 2557                            | DQ667350                  | DQ667240     | AY570462                  |
| Yes  |      | <i>Origanum vulgare</i> L.                                              | cult-USA (WIS)       | JBW 2567                            | DQ667353                  | DQ667243     | AY570463                  |
| Yes  |      | <i>Perilla frutescens</i> (L.) Britton                                  | cult-USA (WIS)       | JBW 1078                            | DQ667356                  | DQ667246     | DQ667439                  |
| Yes  | Yes  | <i>Perovskia atriplicifolia</i> Benth.                                  | cult-USA (WIS)       | JBW 2524                            | DQ667341                  | DQ667223     | AY570464                  |
| Yes  | Yes  | <i>Perovskia scrophulariaefolia</i> Bunge                               | herb-MO 5201778      | Kinziraeva 6751                     | DQ667415                  | DQ667330     | DQ667519                  |
| Yes  |      | <i>Pogogyne floribunda</i> Jokerst                                      | herb-MO 4282587      | Bartholemew 6021                    | DQ667416                  | DQ667331     | DQ667520                  |
| Yes  |      | <i>Poliomintha palmeri</i> Hemsl                                        | herb-F               | Diggs Nee 2531                      | DQ667398                  | DQ667311     | DQ667498                  |
| Yes  |      | <i>Prunella vulgaris</i> L.                                             | wild-USA (WIS)       | JBW 3225                            | DQ667407                  |              | DQ667508                  |
| Yes  |      | <i>Pycnanthemum virginianum</i> (L.)<br>Durand & Jacks ex Rob & Fernald | wild-USA (WIS)       | JBW 3224                            | DQ667406                  | DQ667319     | DQ667507                  |
| Yes  |      | <i>Rhododon ciliatus</i> (Benth.) Epl.                                  | herb-F               | W.C. Holmes 8215                    | DQ667399                  | DQ667312     | DQ667499                  |
| Yes  | Yes  | <i>Rosmarinus officinalis</i> L.                                        | cult-USA (WIS)       | JBW 2558                            | DQ667351                  | DQ667241     | AY570465                  |

Continued

TABLE 1. *Continued*

| Men. | Sal. | Taxon                                              | Locality              | Voucher                       | <i>psbA-trnH</i><br>sequence | ITS sequence | <i>trnL-trnF</i><br>sequence |
|------|------|----------------------------------------------------|-----------------------|-------------------------------|------------------------------|--------------|------------------------------|
| Yes  | Yes  | <i>Salvia aegyptiaca</i> L.                        | herb-E                | McLeish 3728                  | DQ667380                     | DQ667285     | DQ667470                     |
| Yes  | Yes  | <i>Salvia aethiopsis</i> L.                        | wild-Armenia (MJG)    | Hellwig 26/6/02               | DQ667370                     | DQ667272     | AY570466                     |
| Yes  | Yes  | <i>Salvia apiana</i> Jepson                        | wild-USA (WIS)        | JBW 2509                      | DQ667338                     | DQ667214     | DQ667425                     |
| Yes  | Yes  | <i>Salvia aristata</i> Aucher                      | herb-E                | Wedelbo & Assadi s.n.         | DQ667375                     | DQ667280     | DQ667465                     |
|      | Yes  | <i>Salvia atrocyanea</i> Epl.                      | wild-Bolivia (MJG)    | P. Wester 3                   |                              | DQ667270     | DQ667456                     |
| Yes  | Yes  | <i>Salvia aucheri</i> var. <i>canescens</i> Benth. | herb-E                | Archibald 7670                | DQ667381                     | DQ667286     | DQ667471                     |
| Yes  | Yes  | <i>Salvia austriaca</i> Jacq.                      | cult-Mainz. Bot. Gar. | Claßen-Bockhoff –<br>2004     | DQ667408                     | DQ667323     | DQ667512                     |
|      | Yes  | <i>Salvia axillaris</i><br>Moc. et Sesse ex Benth. | Wild-Mex (WIS)        | JBW 3038                      |                              | DQ667294     | DQ667480                     |
| Yes  | Yes  | <i>Salvia azurea</i> Michx. ex Lam.                | wild-USA (WIS)        | JBW 3222                      | DQ667404                     | DQ667317     | DQ667505                     |
|      | Yes  | <i>Salvia bangii</i> Rusby                         | wild-Bolivia (MJG)    | P. Wester 10                  |                              | DQ667263     | DQ667449                     |
| Yes  | Yes  | <i>Salvia cabulica</i> Benth.                      | herb-E                | Ghafoor & Goodman<br>5148     | DQ667382                     | DQ667287     | DQ667472                     |
| Yes  | Yes  | <i>Salvia cacaliifolia</i> Benth.                  | cult-RBG-Edinburgh    | 1959–9358A                    | DQ667367                     | DQ667259     | DQ667445                     |
|      | Yes  | <i>Salvia californica</i> Brandegee                | cult-USA (WIS)        | JBW 2520                      |                              | DQ667213     | DQ667424                     |
| Yes  | Yes  | <i>Salvia canariensis</i> L.                       | cult-RBG-Edinburgh    | 1986–0478                     | DQ667364                     | DQ667256     | AY570469                     |
|      | Yes  | <i>Salvia candicans</i> Mart. & Gal.               | Wild-Mex (WIS)        | JBW 3001                      |                              | DQ667299     | DQ667485                     |
| Yes  | Yes  | <i>Salvia candidissima</i> Vahl.                   | cult-RBG-Edinburgh    | 1999–2202A                    | DQ667368                     | DQ667261     | DQ667447                     |
|      | Yes  | <i>Salvia cedrosensis</i> Greene                   | cult-USA (WIS)        | JBW 2539                      |                              | DQ667228     | AY570470                     |
|      | Yes  | <i>Salvia chionoeplica</i> Epl.                    | cult-USA (WIS)        | JBW 2545                      |                              | DQ667227     | AY570472                     |
|      | Yes  | <i>Salvia clevelandii</i> (Gray) Greene            | wild-USA (WIS)        | JBW 2508                      |                              | DQ667219     | AY570473                     |
| Yes  | Yes  | <i>Salvia cynica</i> Dunn                          | herb-MO 4026698       | Boufford&Bartholemew<br>24763 | DQ667417                     | DQ667332     | DQ667521                     |
| Yes  | Yes  | <i>Salvia daghestanica</i> Sosn.                   | cult-RBG-Edinburgh    | 1988–2283A                    | DQ667366                     | DQ667258     | DQ667444                     |
| Yes  | Yes  | <i>Salvia digitaloides</i> Diels.                  | cult-RBG-Edinburgh    | 1999–2200A                    | DQ667363                     | DQ667255     | AY570477                     |
| Yes  | Yes  | <i>Salvia disermas</i> L.                          | herb-E                | Goldblatt 7500                | DQ667385                     | DQ667290     | DQ667475                     |
|      | Yes  | <i>Salvia divinorum</i> Epl. et Jativa             | cult-USA (WIS)        | JBW 3230                      |                              | DQ667249     | DQ667440                     |
|      | Yes  | <i>Salvia dolomitica</i> Codd                      | cult-USA (WIS)        | JBW 3200                      |                              | DQ667322     | DQ667511                     |
|      | Yes  | <i>Salvia dorrii</i> (Kell.) Abrams                | cult-USA (WIS)        | JBW 2541                      |                              | DQ667229     | DQ667430                     |
|      | Yes  | <i>Salvia eremostachya</i> Jeps.                   | cult-USA (WIS)        | JBW 2533                      |                              | DQ667232     | DQ667432                     |
|      | Yes  | <i>Salvia fulgens</i> Cav.                         | herb-WIS              | 1967–1496A                    |                              | DQ667251     | DQ667441                     |
| Yes  | Yes  | <i>Salvia garipensis</i> E. Meyer ex Benth.        | herb-E                | Strohbach 47123               | DQ667376                     | DQ667281     | DQ667466                     |
| Yes  | Yes  | <i>Salvia glutinosa</i> L.                         | cult-USA (WIS)        | JBW 2568                      | DQ667359                     | DQ667250     | AY570480                     |
| Yes  | Yes  | <i>Salvia graciliramulosa</i> Epl. et Jativa       | wild-Bolivia (MJG)    | P. Wester 14                  | DQ667372                     | DQ667276     | DQ667461                     |
| Yes  |      | <i>Salvia greatai</i> Brandegee                    | wild-USA (WIS)        | JBW 2511                      | DQ667339                     | DQ667215     | AY570481                     |
|      | Yes  | <i>Salvia haenkei</i> Benth.                       | wild-Bolivia (MJG)    | P. Wester 71                  |                              | DQ667271     | DQ667457                     |
|      | Yes  | <i>Salvia henryi</i> Gray                          | wild-USA (WIS)        | JBW 2516                      |                              | DQ667216     | AY570482                     |
|      | Yes  | <i>Salvia hians</i> Royle                          | cult-USA (WIS)        | JBW 2577                      |                              | DQ667239     | AY570483                     |
| Yes  | Yes  | <i>Salvia hirtella</i> Vahl.                       | wild-Peru (MJG)       | Schmidt-Lebuhn 395            | DQ667411                     | DQ667326     | DQ667515                     |
| Yes  | Yes  | <i>Salvia hydrangea</i> Benth.                     | herb-E                | Rechinger 47123               | DQ667383                     | DQ667288     | DQ667473                     |
|      | Yes  | <i>Salvia hydrangea</i> Benth.                     | wild-Armenia (MJG)    | Hellwig 6/18/02               |                              | DQ667265     | DQ667451                     |
|      | Yes  | <i>Salvia inconspicua</i> Benth.                   | Wild-Mex (WIS)        | JBW 3045                      |                              | DQ667298     | DQ667484                     |
|      | Yes  | <i>Salvia lasiantha</i> Benth.                     | Wild-Mex (WIS)        | JBW 3009                      |                              | DQ667300     | DQ667486                     |
|      | Yes  | <i>Salvia lavanduloides</i> Kunth                  | Wild-Mex (WIS)        | JBW 3044                      |                              | DQ667297     | DQ667483                     |
|      | Yes  | <i>Salvia leucophylla</i> Greene                   | Cult.-USA             | JBW s.n.                      |                              | DQ667210     | DQ667422                     |
|      | Yes  | <i>Salvia mellifera</i> Greene                     | wild-USA (WIS)        | JBW 2550                      |                              | DQ667220     | DQ667427                     |
| Yes  |      | <i>Salvia miltiorrhiza</i> Bunge                   | herb-MO 04702028      | Wang Shilong s.n.             | DQ667419                     | DQ667334     | DQ667523                     |
|      | Yes  | <i>Salvia miltiorrhiza</i> Bunge                   | herb-MO               | Boufford <i>et al.</i> 26067  | DQ667379                     | DQ667284     | DQ667469                     |

|     |     |                                                  |                      |                               |          |          |          |
|-----|-----|--------------------------------------------------|----------------------|-------------------------------|----------|----------|----------|
|     | Yes | <i>Salvia mocinoi</i> Benth.                     | wild-Mexico (MJG)    | Crone 15/9/00                 |          | DQ667274 | DQ667459 |
|     | Yes | <i>Salvia mohavensis</i> Greene                  | Cult.-USA            | JBW s.n.                      |          | DQ667212 | DQ667423 |
|     | Yes | <i>Salvia munzii</i> Epl.                        | wild-USA (WIS)       | JBW 2507                      |          | DQ667224 | DQ667428 |
| Yes | Yes | <i>Salvia officinalis</i> L.                     | cult-USA (WIS)       | JBW 2580                      | DQ667342 | DQ667225 | AY570488 |
| Yes | Yes | <i>Salvia orbignaei</i> Benth.                   | wild-Bolivia (MJG)   | P. Wester 43                  | DQ667374 | DQ667279 | DQ667464 |
|     | Yes | <i>Salvia ovalifolia</i> St.-Hil. ex Benth       | wild-Argentina (WIS) | Sytsma 7226                   |          | DQ667315 | DQ667502 |
|     | Yes | <i>Salvia oxiphora</i> Briq.                     | wild-Bolivia (MJG)   | P. Wester 16                  |          | DQ667262 | DQ667448 |
|     | Yes | <i>Salvia pachyphylla</i> Epl. ex Munz           | cult-USA (WIS)       | JBW 2535                      |          | DQ667230 | DQ667431 |
| Yes | Yes | <i>Salvia patens</i> Cav.                        | cult-RBG-Edinburgh   | 1973–9197                     | DQ667361 | DQ667253 | DQ667442 |
| Yes | Yes | <i>Salvia penstemonoides</i> Kunth et Bouche     | cult-USA (WIS)       | JBW 2578                      | DQ667340 | DQ667221 | AY570489 |
|     | Yes | <i>Salvia personata</i> Epl.                     | wild-Bolivia (MJG)   | P. Wester 17                  |          | DQ667269 | DQ667455 |
| Yes | Yes | <i>Salvia platystoma</i> Epl.                    | wild-Bolivia (MJG)   | P. Wester 18                  | DQ667373 | DQ667277 | DQ667462 |
|     | Yes | <i>Salvia polystachya</i> Epl.                   | Wild-Mex (WIS)       | JBW 3035                      |          | DQ667292 | DQ667478 |
|     | Yes | <i>Salvia procurrens</i> Benth.                  | wild-Argentina (WIS) | Bonif 941                     |          | DQ667304 | DQ667490 |
| Yes | Yes | <i>Salvia prunelloides</i> Kunth                 | wild-Mexico (MJG)    | Crone 15/9/00                 | DQ667371 | DQ667275 | DQ667460 |
| Yes | Yes | <i>Salvia przewalskii</i> Maxim.                 | cult-RBG-Edinburgh   | 1993–2067A                    | DQ667362 | DQ667254 | DQ667443 |
|     | Yes | <i>Salvia pubescens</i> Benth.                   | Wild-Mex (WIS)       | JBW 3043                      |          | DQ667296 | DQ667482 |
| Yes | Yes | <i>Salvia regla</i> Cav.                         | Wild-Mex (WIS)       | JBW 3019                      | DQ667402 |          | DQ667503 |
| Yes | Yes | <i>Salvia roborowskii</i> Max.                   | herb-E               | SBQ 852                       | DQ667384 | DQ667289 | DQ667474 |
|     | Yes | <i>Salvia roemeriana</i> Scheele                 | wild-USA (WIS)       | JBW 2515                      |          | DQ667211 | AY570491 |
|     | Yes | <i>Salvia rusbyi</i> Britton ex Rusby            | wild-Bolivia (MJG)   | P. Wester 31                  |          | DQ667278 | DQ667463 |
|     | Yes | <i>Salvia rypara</i> Briq.                       | wild-Bolivia (MJG)   | P. Wester 32                  |          | DQ667266 | DQ667452 |
|     | Yes | <i>Salvia sagittata</i> Ruiz et Pav.             | herb-WIS             | Weigend & Dostert 97/<br>s.n. |          | DQ667260 | DQ667446 |
| Yes |     | <i>Salvia santolinifolia</i> Boiss.              | herb-E               | Runemark <i>et al.</i> 22255  | DQ667386 |          | DQ667476 |
|     | Yes | <i>Salvia sclarea</i> L.                         | cult-USA (WIS)       | JBW 2527                      |          | DQ667222 | AY570492 |
| Yes | Yes | <i>Salvia scutellarioides</i> Kunth.             | wild-Peru (MJG)      | Schmidt-Lebuhn 469            | DQ667412 | DQ667327 | DQ667516 |
|     | Yes | <i>Salvia semiatrata</i> Zucc.                   | herb-WIS             | JBW 3041                      |          | DQ667295 | DQ667481 |
| Yes | Yes | <i>Salvia sessilifolia</i> Baker                 | herb-E               | Jongkind & Rapanarivo<br>929  | DQ667377 | DQ667282 | DQ667467 |
|     | Yes | <i>Salvia sonomensis</i> Greene                  | wild-USA (WIS)       | JBW 2519                      |          | DQ667218 | DQ667426 |
|     | Yes | <i>Salvia sophrona</i> Briq.                     | wild-Bolivia (MJG)   | P. Wester 34                  |          | DQ667268 | DQ667454 |
|     | Yes | <i>Salvia stachydifolia</i> Benth.               | wild-Bolivia (MJG)   | P. Wester 35                  |          | DQ667267 | DQ667453 |
|     | Yes | <i>Salvia summa</i> A. Nelson                    | wild-USA (WIS)       | JBW 1972                      |          | DQ667217 | AY570496 |
| Yes | Yes | <i>Salvia taraxacifolia</i> Hook. fil.           | cult-USA (WIS)       | JBW 2521                      | DQ667337 | DQ667209 | AY570497 |
| Yes | Yes | <i>Salvia tetradonta</i> Hedge                   | herb-V 12403         | Podlech 18906                 | DQ667421 |          | DQ667526 |
|     | Yes | <i>Salvia texana</i> (Scheele) Torrey            | wild-USA             | P. Wester 362                 |          | DQ667321 | DQ667510 |
|     | Yes | <i>Salvia thymoides</i> Benth.                   | wild-Mexico (MJG)    | Crone 10/8/00                 |          | DQ667273 | DQ667458 |
| Yes | Yes | <i>Salvia trichocalycina</i> Benth.              | herb-E               | Breckle 4963                  | DQ667378 | DQ667283 | DQ667468 |
|     | Yes | <i>Salvia tricuspidata</i> Mart. & Gal.          | wild-Mexico (WIS)    | JBW 3037                      |          | DQ667293 | DQ667479 |
|     | Yes | <i>Salvia vaseyi</i> (Porter) Parish             | wild-USA (WIS)       | JBW 2530                      |          | DQ667226 | DQ667429 |
| Yes | Yes | <i>Salvia verbascifolia</i> M. Bieb.             | wild-Armenia (MJG)   | Hellwig 6/13/02               | DQ667369 | DQ667264 | DQ667450 |
|     | Yes | <i>Salvia whitehousei</i> Alziar                 | wild-USA (MJG)       | P. Wester 352                 |          | DQ667320 | DQ667509 |
| Yes |     | <i>Schizonepeta multifida</i> Huang, Feng & Wang | herb-F               | Boyd 4805                     | DQ667400 | DQ667313 | DQ667500 |
| Yes |     | <i>Thymus serpyllum</i> L.                       | cult-USA (WIS)       | JBW 2564                      | DQ667352 | DQ667242 | AY570502 |
| Yes |     | <i>Zhumeria majudae</i> Rech. F. & Wendelbo      | herb-V 01176         | Ghazi s.n.                    |          | DQ667335 | DQ667524 |
|     | Yes | <i>Zhumeria majudae</i> Rech. F. & Wendelbo      | herb-V 21730         | Wendelbo 15793                | DQ667420 | DQ667336 | DQ667525 |
| Yes |     | <i>Ziziphora taurica</i> M. Bieb.                | herb-F               | I. Kapetariidis s.n.          | DQ667401 | DQ667314 | DQ667501 |

Men., included in the Menthae-wide analysis; Sal., included in the *Salvia* clade analysis. In the locality column: herb., herbarium material — herbarium code; wild, wild collected; cult., cultivated material.

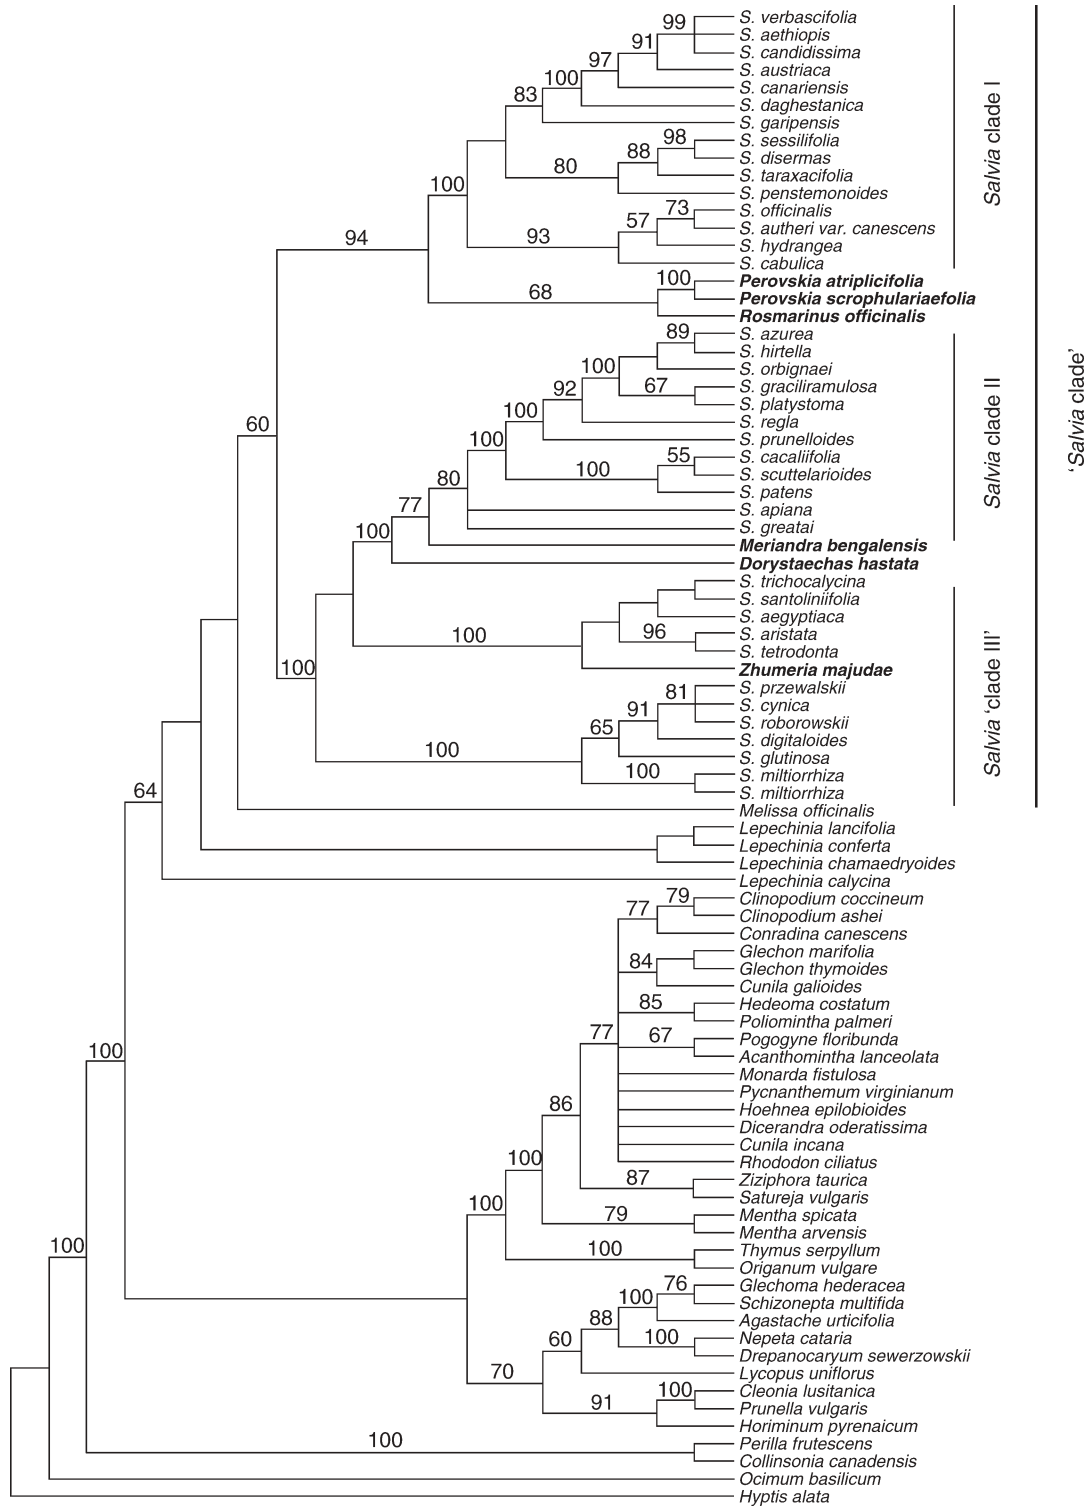

FIG. 3. The 'Menthae-wide' analysis. A three-region DNA, combined parsimony analysis of the chloroplast regions *trnL-F*, *psbA-trnH* and the nuclear rDNA ITS. Strict consensus of 2094 equally parsimonious trees of length 1737 steps. Bootstrap values above 50 % are shown above the branches. In addition to all *Salvia*, the 'Salvia clade' includes the genera highlighted in bold.

Sequences were aligned visually in SeAl v. 2.0a7 (Rambaut, 2001). Indels in the *trnL-F* data set were coded using the guidelines of Baum *et al.* (1994). Regions of ambiguous alignment were excluded from the analyses.

#### Phylogenetic analysis

Phylogenetic relationships within *Salvia* and *Menthaeae* were evaluated in a two-step analysis. The first involved an 84-taxon data set (37 species of *Salvia*) using sequences from the chloroplast regions *psbA-trnH*, and *trnL-F*, and the nuclear ITS region ('*Menthaeae-wide analysis*'). The combined data sets were analysed using maximum parsimony (MP). The heuristic MP analysis (Fitch, 1971) in PAUP\* 4.0b10 (Swofford, 2002) used 100 random addition sequences, with ten trees held at each step during stepwise addition, and tree bisection and reconnection (TBR) branch swapping to explore the possibility of multiple islands of most-parsimonious trees (Maddison, 1991). To assess congruence between the three data sets, 100 replicates of the partition homogeneity test (Farris *et al.*, 1995) were conducted using a full heuristic search, simple taxon addition, TBR branch swapping and saving all most-parsimonious trees. Although the partition homogeneity test has been criticized (Yoder *et al.*, 2001), the test has merit as a first assessment for congruence of data sets (Hipp *et al.*, 2004). Bootstrap (Felsenstein, 1985) support values were used to evaluate support for relationships within the resulting trees. Bootstrap values were obtained through a heuristic search on all characters, with 1000 replicates and ten random addition sequences with TBR replicates with no more than 5000 trees saved per replicate.

The second analysis (the '*Salvia* clade analysis') involved an expanded sampling within the genus *Salvia* (83 species of *Salvia*) and 11 other species representing all closely related genera. This analysis used the chloroplast *trnL-F* and the nuclear rDNA ITS regions and with the same methodologies used in the '*Menthaeae-wide analysis*' except for the inclusion of a maximum-likelihood (ML) analysis in addition to MP. Maximum-likelihood analyses were conducted on the '*Salvia* clade' data set as implemented in PAUP\*. Optimality criteria were explored using Modeltest v. 3.06 (Posada and Crandall, 1998). Heuristic ML searches with TBR branch-swapping were conducted.

#### Staminal morphological investigations

Staminal features investigated by this project are difficult to observe in herbarium specimens. Where fresh material was not available, literature that included detailed information regarding staminal morphology was used to determine the staminal form in each species (see Table 2). General stamen types were characterized for each major clade suggested by the molecular results and mapped onto the terminals in the cladograms (see Figs 4 and 5).

## RESULTS

#### *Analysis of Menthaeae-wide data set*

The aligned length of the *trnL-F* data set was 1137 base pairs (bp). With regions of ambiguous alignment or ambiguous sequences excluded, the total length of included characters was 1062 bp. Twenty indel events were scored for the *trnL-F* data set, of which 18 were parsimony-informative and were included in the analysis. Of the 1082 characters in the analysis 793 were constant, 117 variable characters were uninformative and 172 were parsimony-informative (15.9%). Fitch parsimony analysis of the *trnL-F* region (uninformative characters excluded) found 4399 equally parsimonious trees of 332 steps (CI = 0.645, RI = 0.913, RC = 0.588).

The aligned length of the *psbA-trnH* data set was 624 bp. With regions of ambiguous alignment or ambiguous sequences excluded, the total length of included characters was 382 bp. Of the 382 characters in the analysis, 252 were constant, 58 variable characters were uninformative, and 72 were parsimony-informative (18.8%). Fitch parsimony analysis of the *psbA-trnH* region (uninformative characters excluded) found 9470 equally parsimonious trees of 191 steps (CI = 0.586, RI = 0.864, RC = 0.507).

Nuclear rDNA ITS sequences were not obtained from *Salvia santolinifolia*, *S. tetradonta*, *S. regla*, *Hoehnea epilobioides* or *Prunella vulgaris*. The aligned length of the nuclear ITS data set was 811 bp. With regions of ambiguous alignment or ambiguous sequences excluded, the total length of included characters was 659 bp. Of the 659 characters in the analysis, 364 were constant, 98 variable characters were uninformative and 197 were parsimony-informative (29.9%). Fitch parsimony analysis of the ITS region found 5035 equally parsimonious trees of 1167 steps (CI = 0.336, RI = 0.652, RC = 0.219).

The combined *trnL-F*, *psbA-trnH* and nuclear ITS analysis generated 2123 characters, of which 1409 were constant, 273 were variable but uninformative and 441 were parsimony-informative (20.8%). Fitch parsimony analysis of the three regions found 2094 equally parsimonious trees of 1737 steps (CI = 0.413, RI = 0.755, RC = 0.312).

The partition homogeneity test of the three data sets suggests significant incongruity between all three data sets (*trnL-F*, *psbA-trnH* and nuclear ITS) compared with random partitions of the same size ( $P < 0.01$ ). Further analyses of the specific topological differences found between individual data sets indicate that none of the incongruent clades has bootstrap support above 50% in the individual region analyses. The partition homogeneity test has been demonstrated to be overly sensitive in large data sets such as this (Hipp *et al.*, 2004). Thus, the incongruence suggested by the partition homogeneity test may in fact not reflect genealogical discordance, but artefacts of the overly sensitive nature of the incongruence length difference (ILD) test in large datasets. Despite the incongruence of the data sets, all three data sets independently support the integrity of the '*Salvia* clade' as discussed below, and the three specific clades of *Salvia* discussed in this paper. That is to say, each of the three data sets independently support *Rosmarinus* and *Perovskia* sister to *Salvia* clade I,

TABLE 2. Stamen types of *Salvia* included in study. Types were determined by direct observation or through literature references that describe stamen form in detail

| Taxon                                              | Stamen type | Reference* | Taxon                                        | Stamen type | Reference |
|----------------------------------------------------|-------------|------------|----------------------------------------------|-------------|-----------|
| <i>Salvia aegyptiaca</i> L.                        | M           | 6, 9       | <i>Salvia mellifera</i> Greene               | H           | 1, 2, 3   |
| <i>Salvia aethiopsis</i> L.                        | B           | 1, 8, 9    | <i>Salvia miltiorrhiza</i> Bunge             | N           | 11        |
| <i>Salvia apiana</i> Jepson                        | H           | 1, 2, 3    | <i>Salvia mocinoi</i> Benth.                 | E           | 13        |
| <i>Salvia aristata</i> Aucher                      | M           | 9          | <i>Salvia mohavensis</i> Greene              | H           | 1, 2, 3   |
| <i>Salvia atrocyanea</i> Epl.                      | E           | 13         | <i>Salvia munzii</i> Epl.                    | H           | 1, 2, 3   |
| <i>Salvia aucheri</i> var. <i>canescens</i> Benth. | A           | 14         | <i>Salvia officinalis</i> L.                 | A           | 1         |
| <i>Salvia austriaca</i> Jacq.                      | B           | 10         | <i>Salvia orbignaei</i> Benth.               | E           | 13        |
| <i>Salvia axillaris</i> Moc. et Sesse ex Benth.    | G           | 1, 13      | <i>Salvia ovalifolia</i> St.-Hil. ex Benth   | E           | 13        |
| <i>Salvia azurea</i> Michx. ex Lam.                | E           | 1, 13      | <i>Salvia oxyphora</i> Briq.                 | E           | 13        |
| <i>Salvia bangii</i> Rusby                         | E           | 13         | <i>Salvia pachyphylla</i> Epl. ex Munz       | H           | 1, 2, 3   |
| <i>Salvia cabulica</i> Benth.                      | A           | 9          | <i>Salvia patens</i> Cav.                    | E           | 1, 13     |
| <i>Salvia cacaliifolia</i> Benth.                  | E           | 1, 13      | <i>Salvia penstemonoides</i> Kunth et Bouche | A           | 1         |
| <i>Salvia californica</i> Brandege                 | I           | 1, 2, 3    | <i>Salvia personata</i> Epl.                 | E           | 13        |
| <i>Salvia canariensis</i> L.                       | B           | 6          | <i>Salvia platystoma</i> Epl.                | E           | 13        |
| <i>Salvia candicans</i> Mart. & Gal.               | E           | 1, 13      | <i>Salvia polystachya</i> Epl.               | E           | 1, 13     |
| <i>Salvia candidissima</i> Vahl.                   | B           | 9          | <i>Salvia procurrens</i> Benth.              | E           | 13        |
| <i>Salvia cedrosensis</i> Greene                   | E           | 1, 13      | <i>Salvia prunelloides</i> Kunth             | E           | 1, 13     |
| <i>Salvia chionoeplica</i> Epl.                    | H           | 1, 2, 3    | <i>Salvia przewalskii</i> Maxim.             | N           | 7, 11     |
| <i>Salvia clevelandii</i> (Gray) Greene            | H           | 1, 2, 3    | <i>Salvia pubescens</i> Benth.               | E           | 1, 13     |
| <i>Salvia cynica</i> Dunn                          | N           | 11         | <i>Salvia regla</i> Cav.                     | E           | 1, 13     |
| <i>Salvia daghestanica</i> Sosn.                   | B           | 10         | <i>Salvia roborowskii</i> Max.               | N           | 11        |
| <i>Salvia digitaloides</i> Diels.                  | N           | 11         | <i>Salvia roemeriana</i> Scheele             | A           | 1, 4      |
| <i>Salvia disermas</i> L.                          | A (?)       | 6          | <i>Salvia rusbyi</i> Britton ex Rusby        | E           | 13        |
| <i>Salvia divinorum</i> Epl. et Jativa             | E           | 1, 13      | <i>Salvia rypara</i> Briq.                   | E           | 13        |
| <i>Salvia dolomitica</i> Codd                      | A           | 1, 6       | <i>Salvia sagittata</i> Ruiz et Pav.         | E           | 1, 13     |
| <i>Salvia dorrii</i> (Kell.) Abrams                | H           | 1, 2, 3    | <i>Salvia santolinifolia</i> Boiss.          | M           | 9         |
| <i>Salvia eremostachya</i> Jeps.                   | H           | 1, 2, 3    | <i>Salvia sclarea</i> L.                     | B           | 1         |
| <i>Salvia fulgens</i> Cav.                         | E           | 1, 13      | <i>Salvia scutellarioides</i> Kunth.         | E           | 13        |
| <i>Salvia garipensis</i> E. Meyer ex Benth.        | B           | 6          | <i>Salvia semiatrata</i> Zucc.               | E           | 1, 13     |
| <i>Salvia glutinosa</i> L.                         | N           | 1, 7       | <i>Salvia sessilifolia</i> Baker             | A           | 6         |
| <i>Salvia graciliramulosa</i> Epl. et Jativa       | E           | 13         | <i>Salvia sonomensis</i> Greene              | H           | 1, 2, 3   |
| <i>Salvia greatai</i> Brandege                     | I           | 1, 2, 3    | <i>Salvia sophrona</i> Briq.                 | E           | 13        |
| <i>Salvia haenkei</i> Benth.                       | E           | 13         | <i>Salvia stachyidifolia</i> Benth.          | E           | 13        |
| <i>Salvia henryi</i> Gray                          | A           | 1, 4       | <i>Salvia summa</i> A. Nelson                | A           | 1, 4      |
| <i>Salvia hiems</i> Royle                          | N           | 1, 11      | <i>Salvia taraxacifolia</i> Hook. fil.       | A           | 1, 6      |
| <i>Salvia hirtella</i> Vahl.                       | E           | 13         | <i>Salvia tetradonta</i> Hedge               | M           | 9, 12     |
| <i>Salvia hydrangea</i> Benth.                     | A           | 9, 10      | <i>Salvia texana</i> (Scheele) Torrey        | A           | 5         |
| <i>Salvia hydrangea</i> Benth.                     | A           | 9, 10      | <i>Salvia thymoides</i> Benth.               | E           | 1, 13     |
| <i>Salvia inconspicua</i> Benth.                   | E           | 1, 13      | <i>Salvia trichocalycina</i> Benth.          | M           | 9         |
| <i>Salvia lasiantha</i> Benth.                     | E           | 1, 13      | <i>Salvia tricuspidata</i> Mart. & Gal.      | E           | 1, 13     |
| <i>Salvia lavanduloides</i> Kunth                  | E           | 1, 13      | <i>Salvia vaseyi</i> (Porter) Parish         | H           | 1, 2, 3   |
| <i>Salvia leucophylla</i> Greene                   | H           | 1, 2, 3    | <i>Salvia verbascifolia</i> M. Bieb.         | B           | 10        |
|                                                    |             |            | <i>Salvia whitehousei</i> Alziar             | A           | 5         |

\*Reference: 1, personal observation by the first author; 2, Epling (1938); 3, Neissess (1983); 4, Walker and Elisens (2001); 5, Whitehouse (1949); 6, Hedge (1974a); 7, Claßen-Bockhoff *et al.* (2004b); 8, Hedge (1985); 9, Hedge (1982b); 10, Pobedimova (1954); 11, Xi-wen and Hedge (1994); 12, Hedge (1974b); 13, Epling (1939); 14, Hedge (1982a).

*Meriandra* and *Dorystaechas* sister to *Salvia* clade II, and *Zhumeria* embedded in *Salvia* clade III (i.e. the source of the incongruence between the data sets lies elsewhere than the clades discussed herein). These facts combined with the high bootstrap support associated with each of the clades discussed in this paper in the combined analysis suggests that a ‘total evidence’, combined data set approach is justified.

The tribe Mentheae is supported at 100 % bootstrap in the strict consensus tree (Fig. 3). Within the Mentheae, a ‘*Salvia* clade’ is moderately supported (64 %) with the genera *Lepechinia* and *Melissa* appearing as likely sister genera (Fig. 3). For the purposes of this discussion, the term ‘*Salvia*

clade’ is used to refer to the least inclusive clade which contains all members of *Salvia*. In addition to all *Salvia*, the ‘*Salvia* clade’ includes the genera *Dorystaechas*, *Meriandra*, *Perovskia*, *Rosmarinus* and *Zhumeria* (see Fig. 3). Three clades of *Salvia* are identified more closely related to one or more of these other genera than to the other major clades of *Salvia*; thus, *Salvia* is not monophyletic. *Salvia* clade I is strongly supported as monophyletic and together with the genera *Rosmarinus* and *Perovskia* form a monophyletic lineage (bootstrap = 94 %). *Salvia* clade II, likewise, forms a well-supported monophyletic lineage including two other genera, *Meriandra* and *Dorystaechas* (bootstrap = 100 %). Two remaining, well-supported lineages of *Salvia*, one of



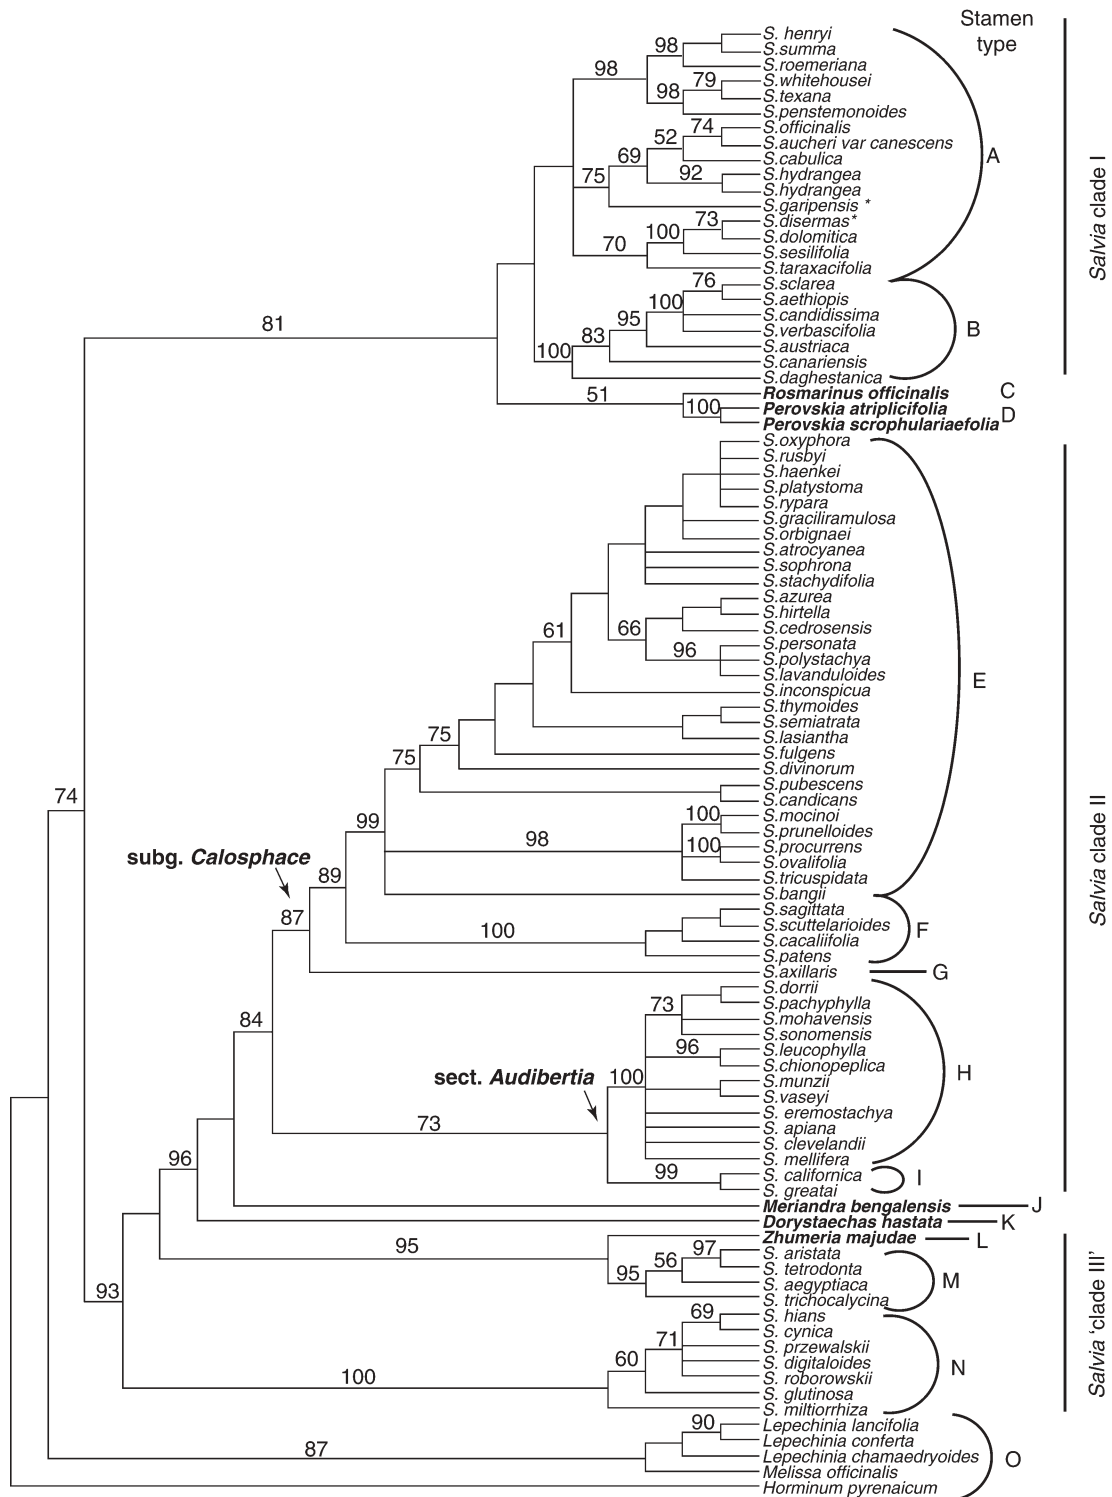

FIG. 4. The '*Salvia* clade' analysis. A two-region DNA, combined parsimony analysis of the chloroplast region *trnL-F* and the nuclear rDNA ITS. Strict consensus of over 100 000 equally parsimonious trees of 1489 steps. Bootstrap values above 50% are shown above the branches. Stamen types corresponding to those in Fig. 5 and Table 2 are shown. Non-*Salvia* genera are highlighted in bold.

which includes the genus *Zhumeria*, occupy one of the few unresolved areas within the 'backbone' of the *Salvia* clade. These two are referred to as *Salvia* 'clade III' and could be

either monophyletic or form a paraphyletic grade leading to *Salvia* clade II (Fig. 3).

*Analysis of the 'Salvia clade' data set*

The aligned length of the *trnL-F* data set was 1019 bp. With regions of ambiguous alignment or ambiguous sequences excluded, the total length of included characters was 923 bp. Of the 1019 characters in the analysis, 755 were constant, 75 variable characters were uninformative and 93 were parsimony-informative (9.1%). Fitch parsimony analysis of the *trnL-F* region found 26 007 equally parsimonious trees of 163 steps (CI = 0.748, RI = 0.971, RC = 0.727).

The aligned length of the nuclear ITS data set (for the 93 included taxa) was 807 bp. With regions of ambiguous alignment or ambiguous sequences excluded, the total length of included characters was 762 bp. Of the 762 characters in the analysis, 428 were constant, 101 variable characters were uninformative and 233 were parsimony-informative (30.6%). Fitch parsimony analysis of the ITS region found over 230 000 equally parsimonious trees of 1286 steps (CI = 0.341, RI = 0.762, RC = 0.260).

The combined *trnL-F* and nuclear ITS analysis generated 1698 characters, of which 1183 were constant, 176 were variable but uninformative and 339 were parsimony-informative (20.0%). Fitch parsimony analysis of the *trnL-F* region (uninformative characters excluded) found over 100 000 equally parsimonious trees of 1489 steps (CI = 0.376, RI = 0.814, RC = 0.306).

The partition homogeneity test of the two data sets suggests significant incongruity between the *trnL-F* and ITS data sets compared with random partitions of the same size ( $P < 0.01$ ). Despite the incongruence of the data sets, both data sets independently support the integrity of the three clades of *Salvia* discussed in this project. With regard to these main clades, the topology generated from the strict consensus of the *trnL-F* data set does not differ from the topology of the combined analysis (although polytomies found in the *trnL-F* strict consensus tree are resolved in the combined analysis). None of the examples of incongruence of the data sets that would affect the interpretations included in this paper found in the ITS strict consensus tree has bootstrap support above 50% in the ITS analysis.

ML produced a single tree with a log likelihood score of -11 859.60033. The ML analyses were performed under the K80(K2P) + G + I model of evolution: ti/tv ratio = 1.683386; proportion of invariable sites = 0.518164; nucleotide frequencies = 0.25; gamma shape parameter = 0.513370; substitution types = 2; rate categories = 4. All clades discussed in this paper were present in both the MP and ML trees, and relationships among those clades were identical under both assumptions. The only topological differences between the MP and ML trees were species relationships within the major lineages defined in this paper.

The strict consensus of all MP trees for the *Salvia* clade analysis (Fig. 4) exhibits the same, well-supported clades seen in the Mentheae-wide analysis. *Salvia*, likewise, is not monophyletic. *Lepechinia* together with *Melissa* form the sister group to the *Salvia* clade. *Salvia* 'clade III' still appears as a paraphyletic grade, although the branch support for paraphyly (or monophyly) is weak. Within *Salvia* clade II, two moderately to well-supported subclades

emerge with the increased taxa sampling: sect. *Audibertia* from western North American sister to the large neotropical subgen. *Calosphace*.

*Staminal morphology*

Two distinct stamen types were identified in the species sampled from *Salvia* clade I (stamen types A and B, Fig. 5; Table 2). The two posterior thecae are expressed and not fused in stamen type A. In stamen type B, the two posterior thecae are not expressed, and the distal posterior ends of the adjacent connectives are fused into a complex structure blocking access to nectar. Five distinct stamen types were identified in *Salvia* clade II. In *Salvia axillaris* (stamen type G, Fig. 5), both posterior thecae are expressed, and not fused to one another. In sections *Standleyana*, *Blakea* and *Hastatae* (stamen type F, Figs 4 and 5), both posterior thecae are aborted, and the adjacent posterior thecae are not or only little fused. The remaining members of *S.* subgen. *Calosphace* (stamen type E, Fig. 5) have both posterior thecae aborted and adjacent posterior connective branches fused. Two stamen types are described for *Salvia* sect. *Audibertia* (Figs 4 and 5): those that exhibit a reduced posterior theca (stamen type I), and those with an entirely aborted posterior theca and connective arm (stamen type H). Two stamen types were recognized in *Salvia* 'clade III'. The first of these (stamen type M, Figs 4 and 5) has both posterior thecae expressed and not fused to one another. The second type of stamen found in *Salvia* 'clade III' (stamen type N, Figs 4 and 5) has both posterior thecae aborted, or expressed and producing little or no pollen. The posterior thecae are flattened by growth on the abaxial side of the theca, resulting in a fan-shaped theca projected forward from the corolla throat. The two adjacent aborted thecae may be entirely fused, simply connivent, or even separated. Whereas access to the nectar is not necessarily blocked, a lever mechanism has been observed in this stamen type in at least some of these species (*S. glutinosa*, *S. hians*).

## DISCUSSION

The molecular results presented here resolve a number of systematic questions within the tribe Mentheae, particularly the manner in which the lever mechanism has evolved within the *Salvia* clade. First, the genera *Lepechinia* and *Melissa* are closely related, and together with the 'Salvia clade' form a monophyletic group within the Mentheae (Fig. 3). Second, as originally demonstrated by Walker *et al.* (2004), there exist three distinct lineages of *Salvia*, each lineage more closely related to other genera in the Mentheae than to the two other major lineages of *Salvia* (Figs 3 and 4). And third, the staminal lever mechanism has evolved three times independently, each time with a distinct morphology (Figs 5 and 6).

*Relationships within the Mentheae*

This project has sampled all putative *Salvia* relatives, as well as representatives of all other major lineages within the

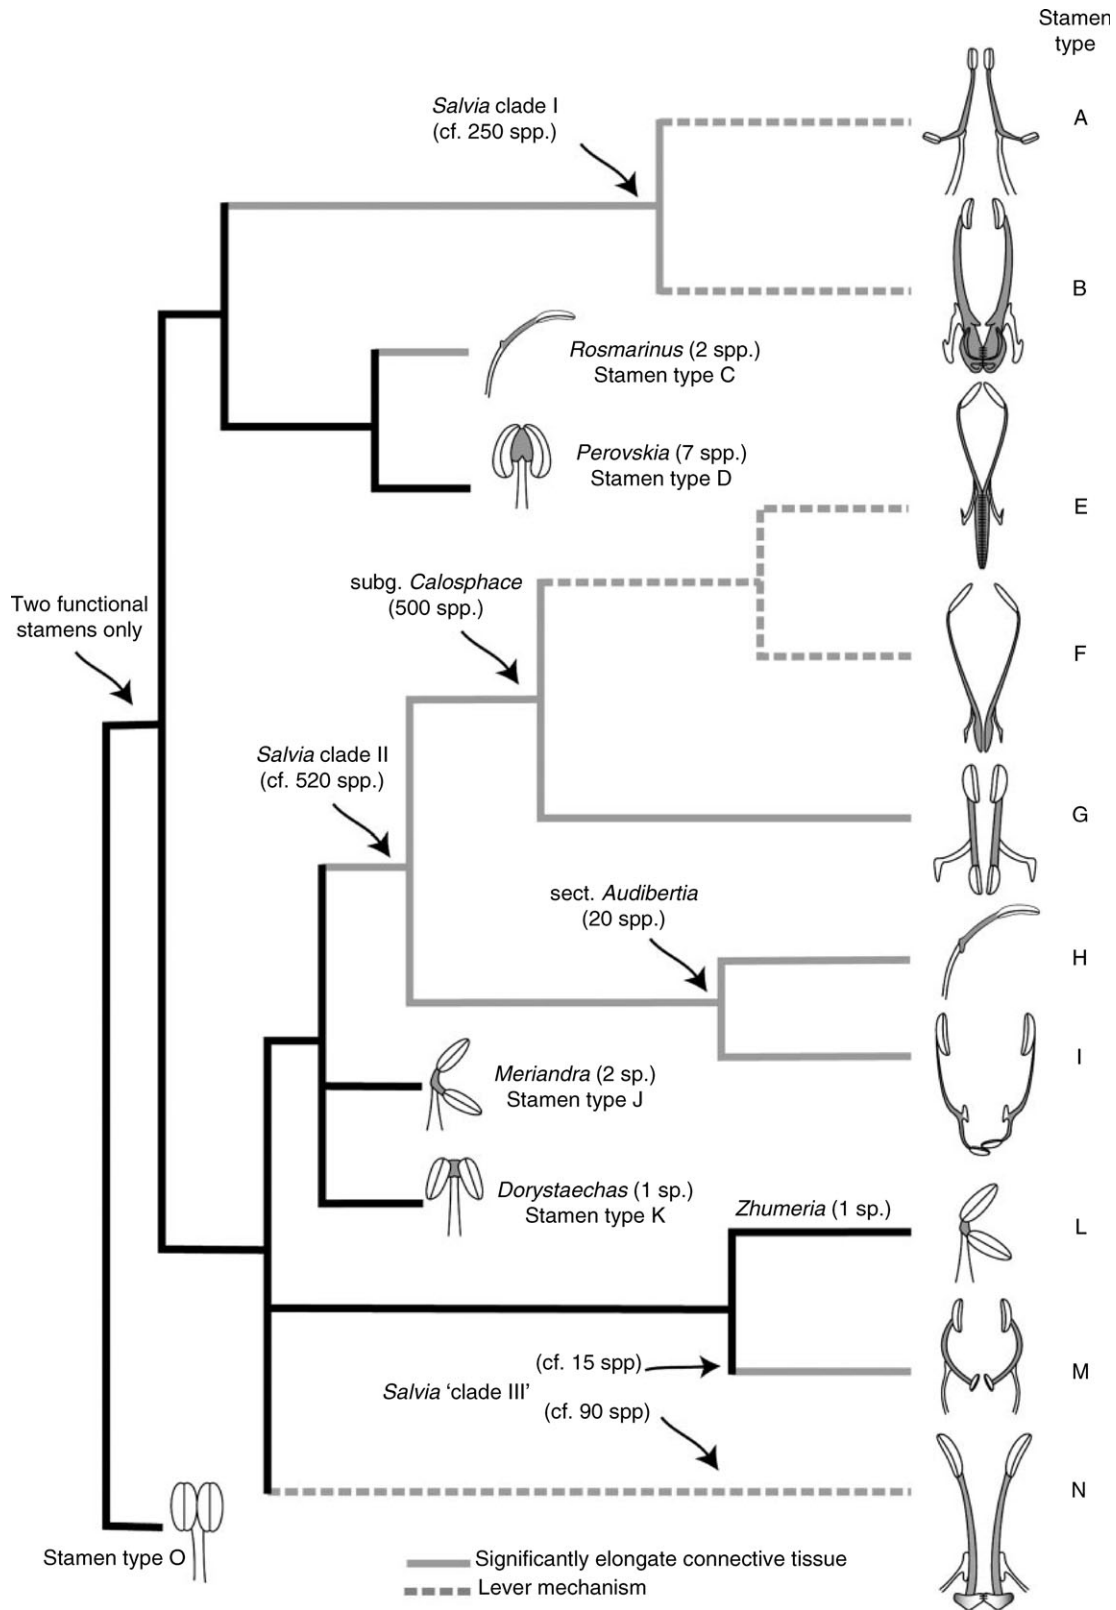

FIG. 5. A summary of the cladogram shown in Fig. 4, with representations of the stamen types found in each clade. Shaded areas of the sketches represent connective tissue. Grey lines in the cladogram represent branches in which significantly elongate connectives are seen. Dashed lines in the cladogram represent lineages in which a lever mechanism is found. Total abortion of the posterior thecae and total fusion of the posterior thecae occurs only in stamen types B, E and N. Species numbers were hypothesized based on subgeneric groups suggested in the literature (Epling, 1938, 1939; Hedge 1974, 1982a, b). The two taxa with asterisks represent taxa not possessing the 'typical' stamen type A, and both possessing stamens with no expressed posterior thecae.

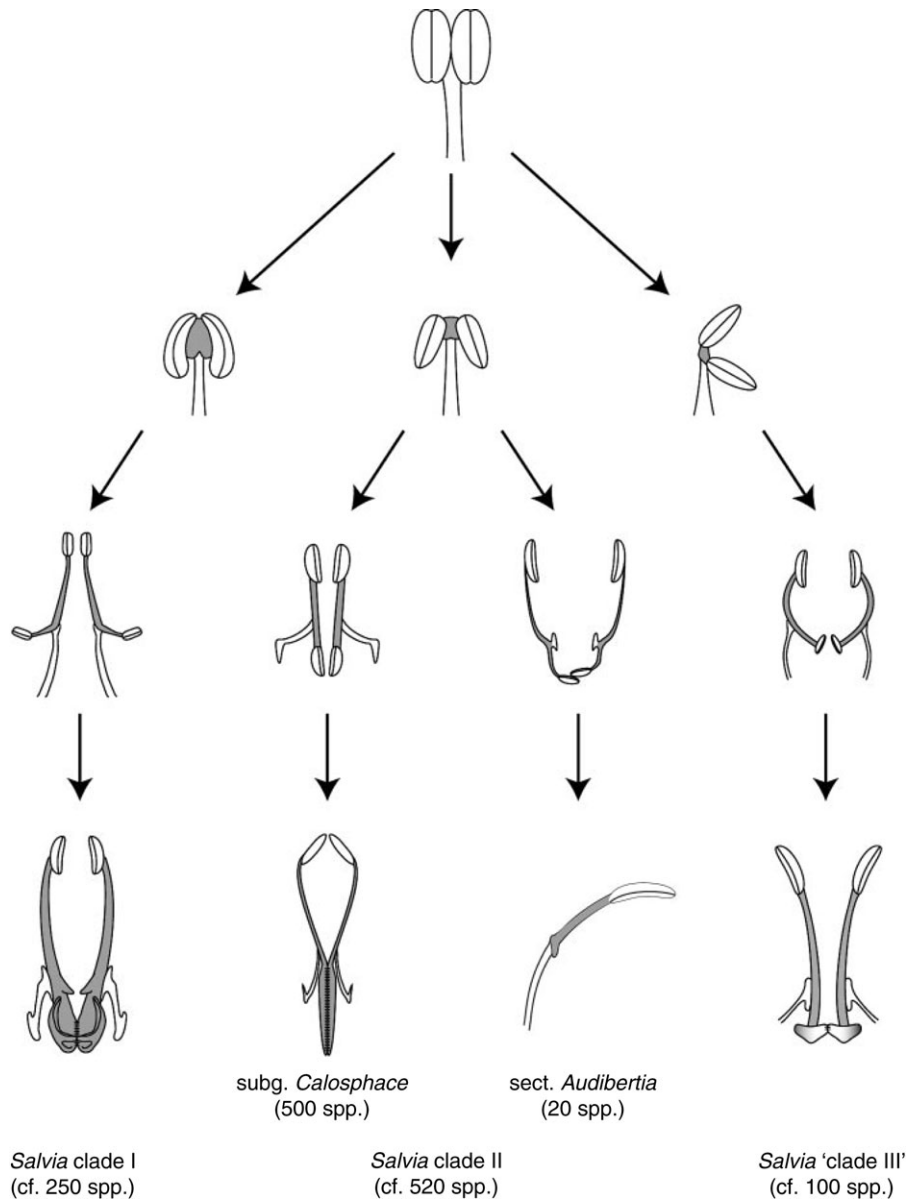

FIG. 6. Hypothesis of evolutionary progression in the independent origin of the three different staminal lever mechanisms found in the tribe Mentheae. This figure represents a modification and revision of Himmelbaur and Stibal's (1934) original interpretation of staminal evolution in *Salvia*. The three lever mechanisms (*Salvia* clade I, clade II and 'clade III') are homologous in that they are derived from the connective tissue of the stamen (shaded in this figure), but have been independently derived and are morphologically distinct from one another.

tribe Mentheae. The purpose here is not to describe relationships between all genera of the Mentheae, but rather to describe the clade to which *Salvia* belongs. A thorough investigation into relationships within the tribe Mentheae, comprehensively sampling all genera within the tribe, is being addressed by Bräuchler *et al.* (2005). For the purposes of this paper, it suffices to say that our sampling within the Mentheae is thorough enough to feel confident in identifying a monophyletic lineage consisting of the genera *Melissa*, *Lepechinia* (including *Chaunostoma*), *Salvia*, *Dorystaechas*, *Meriandra*, *Zhumeria*, *Perovskia* and *Rosmarinus* (Fig. 3), a result also supported by Bräuchler *et al.* (2005). This finding is in agreement with the results of Wagstaff (1992) based on cpDNA

restriction site analysis, although he did not sample *Meriandra* or *Zhumeria*, and the placement of *Melissa* was unresolved. Within this clade, our data support a monophyletic lineage consisting of *Salvia*, *Dorystaechas*, *Meriandra*, *Zhumeria*, *Perovskia* and *Rosmarinus* (the '*Salvia* clade'), a clade characterized morphologically by the abortion of the two adaxial stamens. Our sampling is insufficient in the genus *Lepechinia* to address the relationship between *Lepechinia* and *Melissa*; however, in all analyses, '*Salvia* clade', *Lepechinia* and *Melissa* form a monophyletic group (Fig. 3). *Melissa* includes three species native to Iran and central Asia. *Lepechinia* is a New World group of approximately 40 species, historically presenting numerous taxonomic difficulties (Epling, 1944, 1948; Hart, 1983). Both

*Lepechinia* and *Melissa* have four expressed stamens, each with two parallel thecae and a connective that is not elongated.

In short, we informally recognize within the larger tribe Mentheae a lineage that would correspond to a subtribe consisting of the genera *Salvia*, *Dorystaechas*, *Meriandra*, *Zhumeria*, *Perovskia*, *Rosmarinus*, *Lepechinia* and *Melissa*. This assemblage of genera warrants novel subtribal status as significant changes would have to be invoked to either Bentham's (1876) or Wunderlich's (1967) tribal and subtribal arrangements to accommodate all these genera. However, we choose to wait until relationships within the remainder of Mentheae are more completely known (e.g., Bräuchler *et al.*, 2005) before formally naming this lineage. It is within this subtribe that we concentrate on staminal evolution within the three lineages of *Salvia* as suggested by the molecular phylogenetic data.

#### *Staminal evolution in Salvia clade I*

*Perovskia* and *Rosmarinus* together are well supported as sister to *Salvia* clade I (Figs 3 and 4). Both analyses also place *Perovskia* + *Rosmarinus* + *Salvia* clade I sister to the remainder of the 'Salvia clade'. *Perovskia* has a slightly elongate connective in its two expressed stamens (Bentham, 1876; Bokhari and Hedge, 1971; Wagstaff, 1992; stamen type D, Fig. 5). *Rosmarinus* has a significantly elongated connective in its two stamens, and a total abortion of the posterior branch of the connective and the posterior theca (stamen type C, Fig. 5). The resulting appearance results in the stamen appearing essentially 'normal' (i.e. with no elongate connective), albeit with only one theca at the end, and a notch half way up the 'filament' representing where the filament ends and the connective begins (Trapp, 1956). Thus, unlike the other four genera intercalated in the genus *Salvia*, *Rosmarinus* exhibits the defining character of *Salvia*, a significantly elongate connective. Furthermore, this is the same staminal morphology found in *Salvia* sect. *Audibertia* from western North America, and thus, independent of phylogeny, there is no morphological basis for why *Rosmarinus* should not be included in the genus *Salvia*.

Within *Salvia* clade I, two lineages are identified here, each with a distinct stamen morphology. The first well-supported clade within *Salvia* clade I consists of *S. daghestanica*, *S. canariensis*, *S. candidissima*, *S. verbascifolia*, *S. aethiopsis*, *S. austriaca* and *S. sclarea* in our sampling. These species all display the staminal character of total fusion of the posterior thecae into what Bentham (1876) termed a glutinatorium, and what Claßen-Bockhoff *et al.* (2004a) and Himmelbaur and Stibal (1932–1934) described as 'stamen type V' (stamen type B, Fig. 5; Fig. 1). This morphology creates the classic *Salvia* lever mechanism, where the pollinator is forced to push against the fused posterior thecal tissue and activate the lever in order to access the nectar. Using the species groups established by Hedge (1974a, b, 1982a, b) and the alliances suggested by Pobedimova (1954), it can be assumed that this clade probably contains an additional 50 European and western Asian species.

The other taxa sampled from *Salvia* clade I produce a wide diversity of stamen types, generally including rudimentary posterior thecae, sometimes with pollen produced, and not entirely fused to the adjacent posterior theca or connective arm. Exceptions to this generality can be noted in *S. disermas* and *S. garipensis*, both of which have aborted posterior theca which are fused (Hedge, 1974a). The variations in staminal morphology present in this group is best appreciated by noting the diversity of stamens in the sketches included in Hedge's (1974a) treatment of the *Salvia* of Africa. Field observations by the first author suggest that a lever mechanism is employed in some of these taxa (e.g. *S. taraxacifolia*, *S. texana*) but not in others (e.g. *S. summa*, *S. roemeriana*). Using the species groups established by Hedge (1974a, b, 1982a, b) based on morphological characters and the alliances suggested by Pobedimova (1954), it can be hypothesized that essentially all central and southern African *Salvia* belong to this group, plus an additional at least 50 species from western Asia and the Mediterranean, and eight species in the New World (Walker and Elisens, 2001; Walker *et al.*, 2004). These numbers would place the size of this group at over 100 species.

#### *Staminal evolution in Salvia clade II*

In both analyses, *Dorystaechas* and *Meriandra* are either sister to *Salvia* clade II or represent a grade toward a monophyletic *Salvia* clade II — a large lineage of *Salvia* including the New World sect. *Audibertia* and subgen. *Calosphace*. *Dorystaechas* and *Meriandra* have long been seen as somewhat anomalous genera in the Mentheae with no obvious affinities (Bokhari and Hedge, 1976). The two genera have been placed in the subtribe Meriandreae with *Perovskia* (Bentham, 1876), based on two expressed stamens and parallel thecae, in what Bokhari and Hedge (1976) describe as '... essentially an artificial assemblage of isolated relict genera united essentially only by the 2-staminate corollas'. Each of the genera also have slightly elongate connectives [in the case of *Perovskia* and *Dorystaechas* (stamen type K, Fig. 5), the connectives would probably be better described as swollen]. *Dorystaechas* is a monotypic genus restricted to south-west Anatolia. *Meriandra* has slightly elongate connectives (stamen type J, Fig. 5) and consists of two species, one native to Ethiopia and one to India (ironically, *Meriandra bengalensis* is the Ethiopian species).

Within the larger picture of the genus *Salvia*, sect. *Audibertia* represents an anomalous group restricted to the California Floristic Province and adjacent deserts. The separation of this group from other *Salvia* has been based on chemical compounds, shrubby habit with strongly lignified stems (although not present in all species), and, most importantly, on the structure of its stamens (Neissess, 1983). Sect. *Audibertia* is unusual within *Salvia* in having the posterior branch of the connective entirely aborted (although the genus *Rosmarinus* shows a similar phenomenon, as do some individuals of the Old World *S. verticillata*). Whereas the anterior branch of the connective is still elongate, functionally it acts in the same manner

as would a simple filament, albeit with only a single theca at its end (Bentham, 1876; Epling, 1938; Neissess, 1983) (stamen type H, Fig. 5). Worthy of note is a difference in staminal morphology seen between *Salvia* sect. *Audibertia* and the genus *Rosmarinus*. Whereas the ‘joint’ between the filament and connective is indicated by a notch on the top of the stamen in *Rosmarinus*, an articulation circling the entire filament is found at that same ‘joint’ in sect. *Audibertia*. Occasionally the posterior theca and connective branch is re-expressed in members of sect. *Audibertia*.

Contrary to the most recent treatment of the section (Neissess, 1983), our preliminary data suggest that sect. *Audibertia* (*sensu* Bentham) is a monophyletic lineage (Figs 3 and 4), and the species included in Neissess’ (1983) sect. *Echinosphace* probably represent a grade toward a monophyletic sect. *Audibertia* (*sensu* Neissess, 1983). The staminal morphology of sect. *Echinosphace* (four spp.) is distinct from sect. *Audibertia* (*sensu* Neissess) in that sect. *Echinosphace* displays the plesiomorphic character of the posterior branch of the connective and the posterior theca always being expressed, albeit reduced (stamen type I, Fig. 5). Section *Audibertia* (*sensu* Neissess) displays the derived character of no expressed posterior theca, and thus it is possible to define a progression from both thecae being expressed to the entire abortion of the posterior theca in this clade as well.

*Salvia* subgen. *Calosphace* consists of nearly 500 species and occurs throughout the New World, with centres of diversity in Mexico, the Andean region, and southern Brazil and Argentina. Epling (1939) created the only comprehensive treatment of the subgenus, organizing 468 species into 91 sections (and in supplementary notes, an additional 71 species and 13 sections). Stumbling blocks to past and future work in subgen. *Calosphace* are (1) the lack of knowledge of relationships between sections (an issue Epling did not address) and (2) the lack of faith in the monophyly of some of his larger sections. For these reasons, the only works to have been completed at the sectional level since Epling’s time have generally been limited to sections of five or fewer species (Peterson, 1978; Ahlenslager, 1984; Turner, 1996). In those revisions dealing with larger sections [Serna and Ramamoorthy, 1993 (11 species); Torke, 2000 (eight species)], the monophyly of those sections was not addressed. The sampling included with this paper is part of a larger project investigating large-scale relationships within the subgenus *Calosphace*.

The typical staminal morphology for subgen. *Calosphace* consists of an elongation of the posterior connective branch, fusion of the two adjacent connective arms and no differentiation of tissue at the distal end of the connective branch (stamen type E, Fig. 5). As is well documented by, among others, Claßen-Bockhoff *et al.* (2004a), Baikova (2002, 2004), Epling (1939), a tooth is often present on the lower side of the posterior connective branch. Claßen-Bockhoff *et al.* (2004a) clearly demonstrated ontogenetically that the aborted posterior theca may be either located at the distal end of the connective arm, or in some cases represented by a dorsal outgrowth of the connective. Their finding suggests that the formations of the

connective arm found within subgen. *Calosphace* that form the basis of the lever mechanism may not all be homologous. Despite that important difference, staminal morphology within the subgenus is uniform with respect to no posterior thecae being expressed and the two posterior connective arms, or dorsal outgrowths of the connective being fused. This uniformity is true across the entirety of subgen. *Calosphace* except for four of Epling’s sections (sections *Hastatae*, *Blakea*, *Standleyana* and *Axillares*). Sections *Hastatae* (seven spp.), *Blakea* (four spp.) and *Standleyana* (one sp.) all have a total abortion of the posterior thecae; however, the connective arms do not entirely fuse. These three sections are all included within the clade represented by stamen type F (Figs 4 and 5), and form a monophyletic group. *Salvia axillaris*, of monotypic section *Axillares*, is the only member of *Salvia* subgen. *Calosphace* to have expressed posterior thecae (stamen type G, Fig. 5). The molecular phylogeny suggests that *S. axillaris* is sister to the remainder of subgen. *Calosphace*. In turn, *Hastatae*, *Blakea* and *Standleyana* represent a monophyletic lineage sister to remaining members of the subgenus. These four sections thus depict an evolutionary ‘trail’ of staminal morphology, showing a progression from both thecae expressed and no fusion of posterior connective branches, to abortion of posterior thecae and no fusion of posterior connective branches, and ultimately to the typical staminal morphology in subgen. *Calosphace* of abortion of posterior thecae and fusion of connective branches (see Figs 5 and 6).

#### *Staminal evolution in Salvia ‘clade III’*

In addition to the clearly delineated *Salvia* clade I and *Salvia* clade II, there exists a group of *Salvia* that fit into neither of the above groups. The molecular and morphological evidence clearly supports *Salvia* ‘clade III’ as having an independent origin of the lever mechanism (Fig. 5). However, this group of *Salvia* may represent a paraphyletic grade consisting of two monophyletic lineages rather than a single monophyletic clade (Figs 3 and 4).

One of the two lineages consists of a group of western Asian and northern African species including *S. aristata*, *S. aegyptiaca*, *S. tetradonta*, *S. trichocalycina* and *Zhumeria majudae* (Fig. 4). The *Salvia* in this first lineage all have somewhat elongate connectives, both thecae producing pollen, and the posterior thecae never fused (stamen type M, Fig. 5). *Zhumeria majudae* is a shrub native to Iran with historically uncertain affinities (Bokhari and Hedge, 1976), but placed in our analyses as sister to this clade of *Salvia* (Fig. 4). *Zhumeria* is unusual within the broader ‘*Salvia* clade’ in that, in addition to the two fertile stamens, two large staminodes are easily identified in the corolla (Bokhari and Hedge, 1976). The thecae of the two fertile stamens are somewhat separated, though without a distinct connective (stamen type L, Fig. 5). Using the species groups established by Hedge (1974a, b, 1982a, b), based on morphological characters in addition to the species sampled here, this first lineage of *Salvia* ‘clade III’ probably also includes *Salvia bazmanica*, *S. santolinifolia*, *S. macilentia*, *S. tebesana*,

*S. eremophila*, *S. deserti*, *S. chudaei*, *S. pterocalyx* and *S. rechingeri*.

The second lineage belonging to *Salvia* ‘clade III’ consists of a group of Asian and Mediterranean species. In our sampling, this clade consists of *S. glutinosa*, *S. miltiorrhiza*, *S. hians*, *S. cynica*, *S. przewalskii*, *S. digitaloides* and *S. roborowskii*. *Salvia glutinosa* and *S. miltiorrhiza* are probably the best known members of this group, and each expresses the staminal morphology typical of all members of this group. The posterior thecae are rudimentary, and produce no or very little pollen. Often (although not always) in this group, the two adjacent posterior thecae post-genitally fuse (e.g. *S. glutinosa*, *S. przewalskii*; Claßen-Bockhoff *et al.*, 2004a). These two posterior thecae are somewhat fan-shaped and are projected forward from the corolla throat (stamen type N, Fig. 5) and a lever mechanism can be employed whether or not the posterior thecae fuse. Although this group of species probably includes nearly 100 species with a likely centre of diversity in China, it is currently impossible to define the exact extent of this clade owing to lack of familiarity with *Salvia* of China and the fact that the particulars of staminal morphology are rarely included in species descriptions.

#### Summary of staminal evolution in *Salvia*

The inferred progression in staminal evolution within the *Salvia* clade is depicted in Fig. 6 based on the tree-mapping of the stamen types defined in this project from *Salvia* and intercalated genera (Fig. 5). From the ancestral Mentheae stamen type without elongate connectives (stamen type O, Fig. 5), slightly elongate connectives evolved at least three times in the *Salvia* clade in lineages recognized as other genera (stamen types D, J, K and L, Fig. 5). The genera with these intermediate stamen types are either basal or sister to the three (or more depending on resolution within *Salvia* ‘clade III’) major clades of *Salvia* possessing the variety of stamen types described above. The staminal lever has thus independently originated three times, each time following the progression described above, and each time resulting in the functionally convergent feature of a staminal lever (Figs 5 and 6).

In hindsight, Himmelbaur and Stibal (1932–1934) presented a remarkably accurate assessment of staminal evolution in the genus *Salvia*. Working with limited material, and lacking the molecular evidence to suggest phylogenetic relatedness of *Dorystaechas*, *Meriandra*, *Zhumeria*, *Perovskia* and *Rosmarinus* to *Salvia*, the general progression in staminal evolution they suggested for the genus *Salvia* is similar in some fundamental points to that presented here. These points include their recognition of (1) the plesiomorphic staminal state as having two expressed thecae and no lever mechanism in each stamen and (2) parallel origins of the lever mechanism in the New World and the Old World. Some of the specific examples they suggest, such as *Salvia* sections *Hastatae*, *Blakea* and *Standleiana* being intermediate between the plesiomorphic state and derived state seen in core *S.* subgen. *Calosphace*, are exactly the relationships suggested by the molecular data. The molecular approach

employed here clarifies the phylogenetic relationships and thus the relationships of different stamen types.

The molecular data presented in this paper strongly support at least three independent origins of the lever mechanism in *Salvia*. However, Claßen-Bockhoff *et al.* (2004a) clearly demonstrated through developmental studies the homology of the staminal lever mechanism across all major lineages of *Salvia* — that is, each type is derived from the elongation of the connective tissue. Do the findings of Claßen-Bockhoff *et al.* (2004a) concerning homology of the staminal lever contradict the findings here of three separate origins of the staminal lever mechanism? Three lines of evidence strongly support that these staminal levers, although homologous at some level, represent the evolutionary products of three separate events. First, our findings suggest that whereas the lever mechanisms in *Salvia* are all derived from connective tissue, the precise staminal morphology of the lever mechanism in each of the three major lineages of *Salvia* supports three independent origins of the lever mechanism in different ways. The ‘gubernaculum’ (Bentham, 1876; Claßen-Bockhoff *et al.*, 2004a, stamen type III; stamen type B, Fig. 5) seen in *Salvia* clade II is never found in *Salvia* clade I or III. The ‘glutinatorium’ (Bentham, 1876; Claßen-Bockhoff *et al.*, 2004a, stamen type V; stamen type E, Fig. 5) seen in *Salvia* clade I is never found in *Salvia* clade II or III. The fan-shaped, connivent posterior thecae (stamen type N, Fig. 5) seen in *Salvia* ‘clade III’ are never found in *Salvia* clade I or II. Within each of the major lineages of *Salvia* described herein, Zalewska (1928), Himmelbaur and Stibal (1932–1934), Hedge (1974a, b, 1982a, b) and Claßen-Bockhoff *et al.* (2004a) have noted the uniformity of staminal morphology. Second, further support for three independent origins of the staminal lever mechanism comes from the molecular phylogeny, which strongly places each of the three clades with a lever mechanism as sister to a group of *Salvia* with elongate connectives, but no lever mechanism. Third, and more significantly, each of these three more inclusive lineages of *Salvia* is in turn sister to genera without significantly elongate connectives (in the case of *Salvia* ‘clade III’, the genus *Zhumeria* is sister to one of the two groups in ‘clade III’).

It is not only trends in staminal evolution that are consistent across the various lineages in the ‘*Salvia* clade’, but some of the specific stamen types are surprising in their parallel recurrence. For example, stamen type A in *Salvia* clade I is scarcely distinguishable from stamen types G or M in *Salvia* clades II and III. Another striking example of parallel recurrence of similar stamen types is the multiple origins of a stamen type exhibiting total abortion of the posterior theca and posterior connective branch. This stamen type has independently derived in *Salvia* sect. *Audibertia* (stamen type H), *Rosmarinus* (stamen type C) and in *Salvia verticillata* (not shown). *Salvia verticillata* belongs to the subclade of *Salvia* clade I expressing stamen type A (Figs 4 and 5), but itself often has the posterior branch of the connective aborted (Himmelbaur and Stibal, 1932–1934; Claßen-Bockhoff *et al.*, 2004a, b; Walker *et al.*, 2004). In each of these three examples, the stamens have gone through a complicated evolutionary progression only

to end up with a stamen that in superficial appearance is scarcely distinguishable from the plesiomorphic state for the *Salvia* lineage, except in the fact that it has one theca instead of two.

This work demonstrates that the story of staminal evolution within the ‘*Salvia* clade’ is remarkable in its recurrent nature. On three different occasions (*Salvia* clade I, clade II and ‘clade III’) there is a four-step progression from slight elongation of the connective to significant elongation of the connective, to loss of fertility of the posterior thecae, and ultimately to the fusion of the posterior branches of the connectives (Figs 5 and 6).

#### Issues in cases of parallel evolution

That all *Salvia* belong to a single, well-defined lineage within the tribe Mentheae begs the question of whether *Salvia* is truly polyphyletic or simply paraphyletic. To make the nearly 1000 species of *Salvia* monophyletic would require only the inclusion of 13 species from the genera *Perovskia* (seven spp.), *Rosmarinus* (two spp.), *Meriandra* (two spp.), *Dorystaechas* (one sp.) and *Zhumeria* (one spp.). However, this paper demonstrates that the character that defines *Salvia* within the Mentheae (the significantly elongate connective) has independently originated in each of the three major *Salvia* lineages. The independent origin of the defining character for *Salvia* is supported by the molecular phylogeny, that each of the major clades of *Salvia* is associated with a genus that does not express the significantly elongate connective, and by the distinct staminal morphology in each of the major lineages of *Salvia*. Thus, this is not the case where 13 species not included in the genus *Salvia* represent anomalous members of the genus *Salvia* that have undergone character reversals (i.e. *Salvia* is paraphyletic). Rather, the significantly more parsimonious explanation is that the genera associated with *Salvia* never developed the character that defines the ‘genus’ *Salvia*. That is, *Salvia* is polyphyletic in that it is defined by a convergent character. If the genera intercalating themselves within *Salvia* were larger in size, or if more genera were present in the *Salvia* lineage, it would not be difficult to accept the polyphyly of *Salvia*. If the other five genera had become extinct, one could engage in a philosophical discussion as to the monophyly of a clade whose defining character evolved multiple times. However, the *Salvia* clade represents a wonderful example of evolution leaving a ‘trail’ as it progressed. Gould (1989) suggested that evolutionary novelties are chance occurrences, unlikely to be repeated in different times and places. This general philosophy no doubt played a role in the long-held assumption of the monophyly of *Salvia* based on the ‘unlikely’ origin of something as complex as the lever mechanism multiple times. However, the story of staminal evolution in *Salvia* presented here suggests that in the context of a selective regime, Gould’s evolutionary ‘tape’ can in fact repeat itself despite long odds — perhaps in response to similar genetic canalizations, phylogenetic constraint, similar pollination-selective regimes and/or convergent tendencies.

It is certainly worth noting that the large species radiations seen in each of the three clades of *Salvia* are associated with the formation of a lever mechanism. Functional analyses of the lever mechanism evolved in the various lineages of *Salvia*, currently being addressed by Claßen-Bockhoff *et al.* (2004a), Thimm *et al.* (2005), Wester and Claßen-Bockhoff (2006) and Reith *et al.* (2006), will shed light on the similarity of the functional aspects of the progression in staminal evolution seen in *Salvia*. These functional analyses, in concert with the phylogenetic data, will, it is hoped, ultimately afford the opportunity to address the suggestion of Claßen-Bockhoff *et al.* (2004b) that the lever mechanism is a key innovation driving species radiations within the genus *Salvia* (*sensu* Hodges and Arnold, 1995; Hodges, 1997; Barraclough *et al.*, 1998; Pellmyr and Krenn, 2002).

#### ACKNOWLEDGEMENTS

The authors thank Mike Powell, Bart O’Brien, Janet Latham, Petra Wester, Regine Claßen-Bockhoff, Ian Hedge and Richard Walker for help in obtaining plant material; Wisconsin State Herbarium, Royal Botanical Garden-Edinburgh, Field Museum Herbarium and Missouri Botanical Gardens for access to herbarium material; Kandis Elliot for help with the stamen sketches; Petra Wester for insight into staminal morphology, critical discussions and company in the field; Jocelyn Hall and Naomi Delventhal for help with laboratory work; Cody Williams for artwork; and Regine Claßen-Bockhoff and Maximilian Weigend for valuable comments and review of the manuscript. We gratefully acknowledge the support of Davis Grant funds, the California Native Plant Society, a National Science Foundation Dissertation Improvement Grant and the Botanical Society of America Karling Award for funds essential to this project.

#### LITERATURE CITED

- Ahleslager K. 1984. *Systematic studies of Salvia subg. Calosphaea sect. Erythrostachys*. Masters thesis, University of Montana, USA.
- Alziar G. 1988–1993. Catalogue synonymique des *Salvia* L. du monde (Lamiaceae). I.–VI. *Biocosme Mesogéen* 5 (3–4): 87–136; 6 (1–2, 4): 79–115, 163–204; 7 (1–2): 59–109; 9 (2–3): 413–497; 10 (3–4): 33–117.
- Baikova E. 2002. Two ways of stamen development in the subgenus *Calosphaea* (*Salvia*, Lamiaceae). *Botanicheskii-Zhurnal*-(St.-Petersburg) 87: 71–78.
- Baikova E. 2004. Structural types and morphogenesis of stamens in the genus *Salvia* (Lamiaceae). *Botanicheskii-Zhurnal*-(St.-Petersburg) 89: 881–895.
- Barraclough TG, Vogler AP, Harvey PH. 1998. Revealing the factors that promote speciation. *Philosophical Transactions of the Royal Society of London Series B-Biological Sciences* 353: 241–249.
- Baum DA, Sytsma KJ, Hoch PC. 1994. The phylogeny of *Epilobium* L. (Onagraceae) based on nuclear ribosomal DNA sequences. *Systematic Botany* 19: 363–388.
- Bentham G. 1876. Labiatae. in Bentham, G. and J. D. Hooker. *Genera Plantarum* 2: 1160–1196.
- Bokhari MH, Hedge IC. 1971. Observations on the tribe Meriandreae of the Labiatae. *Notes Royal Botanical Garden, Edinburgh* 31: 53–67.
- Bokhari MH, Hedge IC. 1976. *Zhumeria* (Labiatae): anatomy, taxonomy and affinities. *Iran Journal of Botany* 1: 1–10.



- Bräuchler C, Meimberg H, Abele T, Heubl G. 2005. A molecular perspective for tribal concepts and generic boundaries in subfamily Nepetoideae. In: *XVII International Botanical Congress, Vienna, Austria*.
- Cantino PD, Harley AM, Wagstaff SJ. 1992. Genera of Labiatae: status and classification. In: Harley RM, Reynolds T, eds. *Advances in Labiate science*. Kew: Royal Botanic Gardens, 511–522.
- Claßen-Bockhoff R, Wester P, Tweraser E. 2003. The staminal lever arm mechanism in *Salvia* — a review. *Plant Biology* 5: 33–41.
- Claßen-Bockhoff R, Crone M, Baikova E. 2004a. Stamen development in *Salvia*: homology reinvestigated. *International Journal of Plant Science* 165: 475–498.
- Claßen-Bockhoff R, Speck T, Tweraser E, Wester P, Thimm S, Reith M. 2004b. The staminal lever mechanism in *Salvia*: a key innovation for adaptive radiation? *Organisms Diversity & Evolution* 4: 189–205.
- Conti E, Litt A, Sytsma KJ. 1996. Circumscription of Myrtales and their relationships to other rosids: evidence from *rbcL* sequence data. *American Journal of Botany* 83: 221–233.
- Croizat L. 1962. *Space, time, form; the biological synthesis*. Caracas, Venezuela: published by the author.
- Epling C. 1938. The Californian salvias. *Annals of the Missouri Botanical Garden* 25: 95–188.
- Epling C. 1939. A revision of *Salvia*, subgenus *Calosphace*. *Beihefte Feddes Repertorium specierum novarum regni vegetabilis* 110: 1–383.
- Epling C. 1944. *The living mosaic*. Berkeley, CA: University of California Press.
- Epling C. 1948. A synopsis of the tribe Lepechiniae (Labiatae). *Brittonia* 6: 352–364.
- Farris JS, Källersjö M, Kluge AG, Bult C. 1995. Testing significance and incongruence. *Cladistics* 10: 315–319.
- Felsenstein J. 1985. Confidence limits on phylogenies: an approach using the bootstrap. *Evolution* 39: 783–791.
- Fitch WM. 1971. Toward defining the course of evolution: minimum change for a specific tree topology. *Systematic Zoology* 20: 406–416.
- Givnish TJ, Evans TM, Zjhra ML, Berry PE, Sytsma KJ. 2000. Molecular evolution, adaptive radiation and geographic diversification in the amphiatlantic family Rapateaceae: evidence from *ndhF* sequence data. *Evolution* 54: 1915–1937.
- Gould SJ. 1989. *Wonderful life: The Burgess Shale and the nature of history*. New York: W.W. Norton & Co.
- Hart JA. 1983. *Systematics and evolution in the genus Lepechinia*. PhD dissertation, Harvard University, Cambridge, MA, USA.
- Hedge IC. 1974a. A revision of *Salvia* in Africa and the Canary Islands. *Notes Royal Botanical Garden, Edinburgh* 33: 1–121.
- Hedge IC. 1974b. A further note on *Salvia tetradonta*. *Notes Royal Botanical Garden, Edinburgh* 33: 295–299.
- Hedge IC. 1982a. Labiatae. In: Davis PH, ed. *Flora of Turkey and the eastern Aegaeon Islands, vol. 7, Labiatae*. Edinburgh: Edinburgh University Press, 000–000.
- Hedge IC. 1982b. *Salvia*. In: Rechinger KH, ed. *Flora Iranica, vol. 150, Labiatae*. Graz: Akademische Druck und Verlags-Anstalt, 000–000.
- Hedge IC. 1985. *Salvia*. In: Meikle RD, ed. *Flora of Cyprus*. Kew: Royal Botanic Gardens, 000–000.
- Himmelbauer W, Stibal E. 1932–1934. Entwicklungsrichtungen in der Blütenregion der Gattung *Salvia* L. I–III. *Biologia generalis* 8: 449–474; 9: 129–150; 10: 17–48.
- Hipp AL, Hall JC, Sytsma KJ. 2004. Phylogenetic accuracy, congruence between data partitions, and performance of the ILD. *Systematic Biology* 53: 81–89.
- Hodges SA. 1997. Floral nectar spurs and diversification. *International Journal of Plant Science* 158: S81–S88.
- Hodges SA, Arnold ML. 1995. Spurring plant diversification: are floral nectar spurs a key innovation? *Proceedings of the Royal Society of London Series B-Biological Sciences* 262: 343–348.
- Hruby K. 1934. Zytologie und Anatomie der mitteleuropäischen Salbei-Arten. *Beihefte Botanisches Centralblatt* 52: 298–380.
- Huelsenbeck JP, Ronquist FR. 2001. MRBAYES: Bayesian inference of phylogenetic trees. *Bioinformatics* 17: 754–755.
- Maddison DR. 1991. The discovery and importance of multiple islands of most-parsimonious trees. *Systematic Zoology* 40: 315–328.
- Müller H. 1873. *Die Befruchtung der Blumen durch Insekten und die gegenseitige Anpassung beider*. Leipzig: W. Engelmann.
- Neissess KR. 1983. Evolutions, systematics and terpene relationships of *Salvia* section *Audibertia*. PhD dissertation, University of California, Riverside, CA, USA.
- Paton AJ, Springate D, Suddee S, Otieno D, Grayer RJ, Harley MM, et al. 2004. Phylogeny and evolution of basil and allies (Ocimeae, Labiatae) based on three plastid DNA regions. *Molecular Phylogenetics and Evolution* 31: 277–299.
- Pellmyr O, Krenn HW. 2002. Origin of a complex key innovation in an obligate insect-plant mutualism. *Proceedings of the National Academy of Sciences of the USA* 99: 5498–5502.
- Peterson K. 1978. *Systematic studies of Salvia subgenus Calosphace in section Farinaceae*. PhD thesis, University of Maryland, USA.
- Pobedimova EG. 1954. Labiatae. In: Shishkin BK, ed. *Flora of the U.S.S.R., vol. 21, Labiatae*. Moscow: 178–260.
- Posada D, Crandall KA. 1998. Modeltest: testing the model of DNA substitution. *Bioinformatics* 14: 817–818.
- Rambaut A. 2001. Sequence alignment editor, version 2.0a6. Available online at <http://evolve.zoo.ox.ac.uk/>.
- Reith M, Baumann G, Claßen-Bockhoff R, Speck T. 2006. Sharing without mixing? Quantitative analyses of pollen placement on *Apis mellifera* as a pollinator of *Salvia pratensis* and *Salvia nemorosa*. *Annals of Botany* 96: 000–000.
- Serna AS, Ramamoorthy TP. 1993. Revision taxonomica de *Salvia* seccion *Sigmoideae*. *Acta Botanica Mexicana* 23: 65–102.
- Sprengel CK. 1793. *Das entdeckte Geheimnis der Natur im Bau und in der Befruchtung der Pflanzen*. Berlin: Friedrich Vieweg dem altern.
- Swofford DL. 2002. *PAUP\*. Phylogenetic analysis using parsimony (\*and other methods), version 4.0b10*. Sunderland, MA: Sinauer Associates.
- Thimm S, Reith M, Speck T, Claßen-Bockhoff R. 2005. Force measurements in *Salvia* flowers. In: *XVII International Botanical Congress, Vienna, Austria*.
- Trapp A. 1956. Zur morphologie und entwicklungsgeschichte der staubblatter sympetalen bluten. *Botanische Studien* 5: 3–93.
- Turner B. 1996. Synopsis of section *Axillaris* of *Salvia*. *Phytologia* 81: 16–21.
- Wagstaff SJ. 1992. *Phylogeny and character evolution in subfamily Nepetoideae (Labiatae)*. PhD thesis, Ohio University, Athens, USA.
- Wagstaff SJ, Olmstead RG, Cantino PD. 1995. Parsimony analysis of cpDNA restriction site variation in subfamily Nepetoideae (Labiatae). *American Journal of Botany* 82: 886–892.
- Walker JB, Elisens WJ. 2001. A revision of *Salvia* section *Heterosphace* in western North America. *Sida* 19: 571–589.
- Walker JB, Sytsma KJ, Treutlein J, Wink M. 2004. *Salvia* is not monophyletic: implications for the systematics, radiation, and ecological specializations of *Salvia* and tribe Mentheae. *American Journal of Botany* 91: 1115–1125.
- Werth E. 1956. Zur Kenntnis des Androeceums der Gattung *Salvia* und seiner stammesgeschichtlichen Wandlung. *Berichte der Deutschen Botanischen Gesellschaft* 69: 381–386.
- Wester P, Claßen-Bockhoff R. 2006. Floral diversity and pollen transfer in bird-pollinated *Salvia* species. *Annals of Botany* 96: 000–000.
- Whitehouse E. 1949. Revision of *Salvia* section *Salviastrum*. *Field and Laboratory* 17: 151–165.
- Wunderlich R. 1967. Ein Vorschlag zu einer natürlichen Gliederung der Labiaten auf Grund der Pollenkörner, der Samenentwicklung und des reifen Samens. *Österreichische Botanische Zeitschrift* 114: 383–483.
- Xi-wen L, Hedge IC. 1994. Lamiaceae. In: Zheng-yi W, Raven PH, eds. *Flora of China*. St. Louis, tMO: Missouri Botanical Garden Press.
- Yoder AD, Irwin JA, Payseur BA. 2001. Failure of the ILD to determine data combinability for slow loris phylogeny. *Systematic Biology* 50: 408–424.
- Zaleska Z. 1928. Recherches sur l'évolution des étamines, considérée du point de vue de leur adaptation à la pollinisation des fleurs de la Sauge (*Salvia*). *Bulletin international de l'academie polonaise des sciences et de lettres* 3: 133–160.
